# Supplementary material for: Effects of parental autoimmune diseases on type 1 diabetes in offspring can be partially explained by HLA and non-HLA polymorphisms
Source: bioRxiv or medRxiv preprint supplement (doi:10.1101/2024.04.16.24305884), 2025-02-10
Supplement: Supplementary file [file media-1.pdf]

# 1 Supplementary material

## 2 **Effect of parental autoimmune diseases on type 1 diabetes in offspring can be** 3 **partially explained by HLA and non-HLA polymorphisms: a nationwide** 4 **registry and biobank-based study in 7.2M Finns**

5 Feiyi Wang<sup>†1,2</sup>, Aoxing Liu<sup>†1,3,4,5</sup>, Zhiyu Yang<sup>1</sup>, Pekka Vartiainen<sup>1</sup>, Sakari Jukarainen<sup>1</sup>, Satu Koskela<sup>6</sup>,  
6 Richard A. Oram<sup>7</sup>, Lowri Allen<sup>8</sup>, Jarmo Ritari<sup>6</sup>, Jukka Partanen<sup>6</sup>, FinnGen, Markus Perola<sup>9</sup>, Tiinamaija  
7 Tuomi<sup>\*1,10,11,12</sup>, Andrea Ganna<sup>\*1,3,4,5</sup>

- 8 1. Institute for Molecular Medicine Finland (FIMM), Helsinki Institute of Life Science (HiLIFE), University of  
9 Helsinki, Helsinki, Finland  
10 2. Centre for Population Health Sciences, Usher Institute of Population Health Sciences and Informatics,  
11 University of Edinburgh, Edinburgh, Scotland, UK  
12 3. Program in Medical and Population Genetics, Broad Institute of Harvard and MIT, Cambridge, MA, USA  
13 4. Stanley Center for Psychiatric Research, Broad Institute of Harvard and MIT, Cambridge, MA, USA  
14 5. Analytic and Translational Genetics Unit, ATGU, Massachusetts General Hospital, Boston, MA, USA  
15 6. Finnish Red Cross Blood Service, Helsinki, Finland  
16 7. University of Exeter, Exeter, UK  
17 8. Cardiff University and University Hospital of Wales, Cardiff, UK  
18 9. Finnish Institute for Health and Welfare (THL), Helsinki, Finland  
19 10. Abdominal Center, Endocrinology, Helsinki University Hospital, Helsinki, Finland  
20 11. Folkhälsan Research Center, Helsinki, Finland  
21 12. Lund University Diabetes Center, Malmo, Sweden

22 † Joint first authorship

23 \* Joint senior authorship

24 Corresponding author: Andrea Ganna ([andrea.ganna@helsinki.fi](mailto:andrea.ganna@helsinki.fi)) and Tiinamaija Tuomi ([tiinamaija.tuomi@hus.fi](mailto:tiinamaija.tuomi@hus.fi))  
25

26 **Table of Contents**

27

28 **1. Supplementary background**

29 **2. Supplementary methods**

30 2.1. Disease definition and source codes

31 2.2. Inclusion and exclusion criteria of the matched case-control study

32 2.3. Study design for HLA analysis

33 2.3.1. Design of the HLA haplotype analysis

34 2.3.2. Design of the HLA polygenic risk analysis

35 2.4. GWAS summary statistic for LDSC and PGS

36 **3. Supplementary results**

37 3.1. Basic statistics and demographic data

38 3.1.1. Basic estimates in FinRegistry and FinnGen

39 3.1.2. Socio-demographic characteristics in FinRegistry

40 3.2. Registry-based analyses

41 3.2.1. Matched case-control study

42 3.2.2. Association between parental AIDs and T1D in children by sex

43 3.3. Shared genetic background in population

44 3.3.1. Analyses in HLA regions – Haplotype analysis

45 3.3.2. Analyses in HLA regions – PGS Analysis

46 3.3.3. Analyses in non-HLA regions – LDSC

47 3.4. Inter-generation cross-trait transmission

48 3.4.1. Analyses in non-HLA regions – PGS analysis

49 3.4.2. Polygenic transmission disequilibrium tests

50 3.5. Contribution ratio between HLA PGS and non-HLA PGS

51 3.5.1. Associations between PGSs for AIDs and T1D in population

52 3.5.2. Contribution ratio between HLA PGS and non-HLA PGS

53 3.6. Construction of Full-PGS

54 3.6.1. Results for AID prediction using PGS for AID

55 3.6.2. Results for T1D prediction using PGS for AID

56 3.6.3. Results for T1D prediction in offspring using mid-parent PGS for AID

57 3.6.4. PTDT comparisons between Full-PGS and PRS-CS

58 **4. Supplementary discussion**

59 **5. Reference**

60

61

62 **1. Supplementary Background**63 **Table S1: Case reports, clinical studies and population-based studies reporting either co-**  
64 **occurrence or familial aggregation of the listed autoimmune diseases among patients with**  
65 **type 1 diabetes**  
66

| Disease                             | Co-occurrence                                                                                                                                                                                                                                                                            | Familial aggregation                                                                                                                                                                 |                                                                                                               |
|-------------------------------------|------------------------------------------------------------------------------------------------------------------------------------------------------------------------------------------------------------------------------------------------------------------------------------------|--------------------------------------------------------------------------------------------------------------------------------------------------------------------------------------|---------------------------------------------------------------------------------------------------------------|
|                                     |                                                                                                                                                                                                                                                                                          | Clinical study                                                                                                                                                                       | Genetic study                                                                                                 |
| Type 1 diabetes                     | N/A                                                                                                                                                                                                                                                                                      | Sipetić et al. [8]<br>Hanukoglu et al. [13]<br>Anaya et al. [19]<br>Hemminki et al. [24] **<br>Kishi et al. [26]<br>Olamoyegun et al. [43]<br>Yen et al. [46] **<br>Kang et al. [47] | Douek et al. [10]<br>Lambert et al. [15]<br>Erlich et al. [22]<br>Bronson et al. [25]<br>Parkkola et al. [34] |
| Adrenocortical insufficiency        | Barker et al. [17]<br>Van den Driessche et al. [27]<br>Kota et al. [33]<br>Conrad et al. [49] **                                                                                                                                                                                         | Hemminki et al. [24] **                                                                                                                                                              | Wägner et al. [30]<br>Parkkola et al. [35]                                                                    |
| Autoimmune hyperthyroidism          | Gray et al. [5]<br>De Block et al. [23]<br>Van den Driessche et al. [27]<br>Kota et al. [33]<br>Kahaly et al. [41]<br>Kang et al. [47]<br>Conrad et al. [49] **                                                                                                                          | Anaya et al. [19]<br>Hemminki et al. [24] **<br>Ganji et al. [42]<br>Yen et al. [46]<br>Kang et al. [47]                                                                             | Wägner et al. [30]<br>Parkkola et al. [35]                                                                    |
| Autoimmune hypothyroidism           | Samantaray et al. [3]<br>Gray et al. [5]<br>Kordonouri et al. [9]<br>Hanukoglu et al. [13]<br>De Block et al. [23]<br>Van den Driessche et al. [27]<br>Nagy et al. [28]<br>Kota et al. [33]<br>Karavanaki et al. [37]<br>Kahaly et al. [41]<br>Kang et al. [47]<br>Conrad et al. [49] ** | Bottazzo et al. [4]<br>Hanukoglu et al. [13]<br>Anaya et al. [19]<br>Hemminki et al. [24] **<br>Karavanaki et al. [37]<br>Yen et al. [46] **<br>Kang et al. [47]                     | Wägner et al. [30]<br>Parkkola et al. [35]                                                                    |
| Autoimmune hemolytic anemia         | Masood et al. [36]                                                                                                                                                                                                                                                                       | Hemminki et al. [24]                                                                                                                                                                 |                                                                                                               |
| Allergic purpura                    | D'Souza et al. [38]                                                                                                                                                                                                                                                                      |                                                                                                                                                                                      |                                                                                                               |
| Vitamin B12 deficiency anaemia      | Hanukoglu et al. [13]<br>De Block et al. [23]<br>Van den Driessche et al. [27]                                                                                                                                                                                                           | Bottazzo et al. [4]<br>Sipetić et al. [8]<br>Anaya et al. [19]<br>Hemminki et al. [24] **                                                                                            | Wägner et al. [30]<br>Parkkola et al. [35]                                                                    |
| Idiopathic thrombocytopenic purpura | De Block et al. [23]                                                                                                                                                                                                                                                                     | Hanukoglu et al. [13]<br>Hemminki et al. [24]                                                                                                                                        |                                                                                                               |
| Sarcoidosis                         | Benmelouka et al. [45]                                                                                                                                                                                                                                                                   | Hemminki et al. [24] **                                                                                                                                                              |                                                                                                               |
| Primary biliary cholangitis         | Gazzaruso et al. [12]<br>Johnson et al. [44]                                                                                                                                                                                                                                             | Anaya et al. [19]<br>Hemminki et al. [24] **                                                                                                                                         |                                                                                                               |
| Coeliac disease                     | Walker-Smith et al. [1]<br>Thain et al. [2]<br>Hanukoglu et al. [13]<br>Sanchez-Albisua et al. [16]<br>Goh et al. [20]<br>Van den Driessche et al. [27]<br>Zeglaoui et al. [29]<br>Bhadada et al. [31]                                                                                   | Sipetić et al. [8]<br>Hanukoglu et al. [13]<br>Anaya et al. [19]<br>Hemminki et al. [24] **<br>Ganji et al. [42]<br>Kang et al. [47]                                                 | Wägner et al. [30]<br>Parkkola et al. [35]                                                                    |

|                                 |                                                                                                      |                                                                                                                                 |                                            |
|---------------------------------|------------------------------------------------------------------------------------------------------|---------------------------------------------------------------------------------------------------------------------------------|--------------------------------------------|
|                                 | Franzese et al. [32]<br>Kota et al. [33]<br>Kang et al. [47]<br>Conrad et al. [49] **                |                                                                                                                                 |                                            |
| Inflammatory bowel disease      | Kang et al. [47]<br>Conrad et al. [49] *                                                             | Sipetić et al. [8]<br>Hemminki et al. [24] **<br>Yen et al. [46] *<br>Kang et al. [47]                                          | Wägner et al. [30]                         |
| IgA nephropathy                 | Orfila et al. [7]                                                                                    |                                                                                                                                 |                                            |
| Ankylosing spondylitis          |                                                                                                      | Hemminki et al. [24] *                                                                                                          |                                            |
| Mixed connective tissue disease |                                                                                                      | Anaya et al. [19]                                                                                                               | Parkkola et al. [35]                       |
| Rheumatoid arthritis            | Hanukoglu et al. [13]<br>Nagy et al. [28]<br>Kang et al. [47]<br>Conrad et al. [49] **               | Hanukoglu et al. [13]<br>Anaya et al. [19]<br>Hemminki et al. [24] **<br>Kang et al. [47]<br>Yen et al. [46]                    | Wägner et al. [30]<br>Parkkola et al. [35] |
| Sjögren syndrome                | Binder et al. [6]<br>Shimomura et al. [14]                                                           | Anaya et al. [19]<br>Hemminki et al. [24]<br>Yen et al. [46]<br>Kuo et al. [39] **                                              | Parkkola et al. [35]                       |
| Systemic sclerosis              | Zeglaoui et al. [29]                                                                                 | Hemminki et al. [24]                                                                                                            | Parkkola et al. [35]                       |
| Wegener granulomatosis          |                                                                                                      | Hemminki et al. [24] **                                                                                                         |                                            |
| Systemic lupus erythematosus    | Zeglaoui et al. [29]<br>Kota et al. [33]<br>Masood et al. [36]                                       | Anaya et al. [19]<br>Hemminki et al. [24] **<br>Yen et al. [46]                                                                 | Wägner et al. [30]<br>Parkkola et al. [35] |
| Guillain-Barre syndrome         | Hanukoglu et al. [13]                                                                                | Hanukoglu et al. [13]                                                                                                           |                                            |
| Multiple Sclerosis              | Marrosu et al. [48] **                                                                               | Nielsen et al. [18]<br>Anaya et al. [19]<br>Hemminki et al. [24]<br>Marrosu et al. [48] **                                      | Wägner et al. [30]<br>Parkkola et al. [35] |
| Myasthenia gravis               | Wakata et al. [21]<br>Kota et al. [33]<br>Fang et al. [40] **                                        | Hanukoglu et al. [13]<br>Hemminki et al. [24]                                                                                   | Wägner et al. [30]                         |
| Alopecia areata                 |                                                                                                      | Sipetić et al. [8]<br>Hanukoglu et al. [13]                                                                                     |                                            |
| Psoriasis                       | Hanukoglu et al. [13]<br>Masood et al. [26]<br>Kang et al. [47]                                      | Sipetić et al. [8]<br>Hanukoglu et al. [13]<br>Anaya et al. [19]<br>Hemminki et al. [24]<br>Yen et al. [46]<br>Kang et al. [47] | Wägner et al. [30]                         |
| Vitiligo                        | Hanukoglu et al. [13]<br>Van den Driessche et al. [27]<br>Masood et al. [36]<br>Conrad et al. [49] * | Alkhateeb et al. [11]<br>Hanukoglu et al. [13]<br>Anaya et al. [19]                                                             | Wägner et al. [30]                         |

67  
68 The listed studies indicate that at least one case of co-occurrence or familial aggregation was mentioned.  
69 For those studies using nationwide population-based registry data, \*: P-value<0.05, \*\*: P-value<0.01  
70

## 71 2. Supplementary methods

### 72 2.1 Disease definition and source codes

73 We used the disease endpoints as defined by clinical expert groups of the FinnGen study based on the Finnish version  
74 International Classification of Diseases (ICD) codes of version 8 (1969-1986), 9 (1987-1995), and 10 (1996-2019).  
75 More detailed disease definitions can be found from <https://risteys.finregistry.fi/> searching with the FinRegistry code  
76 names. The numbers of parental autoimmune disease (AID) cases ( $N_p$ ) were calculated from study population and  
77 diseases were filtered according to these numbers ( $N_p < 50$ ).

78 **Table S2.1: Definition of disease endpoints through ICD-8, ICD-9, and ICD-10**

79

| Disease                             | Abbreviation | International Classification of Diseases |                |                | N <sub>p</sub> | Delete reason |
|-------------------------------------|--------------|------------------------------------------|----------------|----------------|----------------|---------------|
|                                     |              | ICD-10                                   | ICD-9          | ICD-8          |                |               |
| Type 1 diabetes                     | T1D          | E10 (age < 40)                           | 250 (age < 40) | 250 (age < 40) | 385            |               |
| Adrenocortical insufficiency        | ADDISON      | E27[1-4]                                 | 2554           | 2551           | 166            |               |
| Autoimmune hyperthyroidism          | HYPER        | E05[0]9]                                 | 2420           | 2420           | 635            |               |
| Autoimmune hypothyroidism           | HYPO         | E03[8-9]                                 | 244[8-9]       | 244            | 11485          |               |
| Autoimmune hemolytic anemia         | AIHA         | D591                                     | 2830           | 28390          | 55             |               |
| Allergic purpura                    |              | D690                                     | 2870           | 2870           | 154            |               |
| Vitamin B12 deficiency anaemia      | B12A         | D51                                      | 281[0-1]       | 281[0-1]       | 962            |               |
| Idiopathic thrombocytopenic purpura | ITP          | D693                                     | 2873A          | 28710          | 186            |               |
| Sarcoidosis                         |              | D86                                      | 135            | 135            | 1104           |               |
| Primary biliary cholangitis         | PBC          | K743                                     | N/A            | N/A            | 157            |               |
| Coeliac disease                     | CD           | K900                                     | 5790A          | N/A            | 1129           |               |
| Inflammatory bowel disease          | IBD          | K50 K51                                  | 555 556        | 5630 5631 569  | 2221           |               |
| IgA nephropathy                     |              | N082&D8980                               | N/A            | N/A            | 89             |               |
| Ankylosing spondylitis              | AS           | M45                                      | 7200           | 7124           | 680            |               |
| Mixed connective tissue disease     | MCTD         | M359                                     | 7109           | 73499          | 374            |               |
| Rheumatoid arthritis                | RA           | M0[5-6]                                  | 714[0-2]       | 712[1-3]       | 3224           |               |
| Sjögren syndrome                    | SjS          | M350                                     | 7102           | 73490          | 585            |               |
| Systemic sclerosis                  | SS           | M34                                      | 7101           | 7340           | 118            |               |
| Wegener granulomatosis              | WG           | M313                                     | 4464           | 4462           | 86             |               |
| Systemic lupus erythematosus        | SLE          | M32                                      | 7100           | 7431           | 210            |               |
| Guillain-Barre syndrome             | GBS          | G610                                     | 3570           | 35401          | 120            |               |
| Multiple Sclerosis                  | MS           | G35                                      | 340            | 34099          | 461            |               |
| Myasthenia gravis                   | MG           | G700                                     | 3580           | 7330           | 103            |               |
| Alopecia areata                     | AA           | L63                                      | 7040B 7040C    | 70400          | 175            |               |

|                                                                             |              |                    |                         |      |                    |
|-----------------------------------------------------------------------------|--------------|--------------------|-------------------------|------|--------------------|
| Psoriasis                                                                   | L40          | 6961, 6960A, 6968X | 6869[3 6] 696[00 10 19] | 2486 |                    |
| Vitiligo                                                                    | L80          | 7090F              | 70905                   | 65   |                    |
| Relapsing polychondritis                                                    | M94.1        | N/A                | N/A                     | 14   | N <sub>p</sub> <50 |
| Dermatopolymyositis                                                         | M33          | N/A                | N/A                     | 91   | Overlap with CD    |
| Microscopic polyangiitis                                                    | M31.7        | N/A                | N/A                     | 17   | N <sub>p</sub> <50 |
| Churg-Strauss                                                               | M30.1        | 4460B              | N/A                     | 18   | N <sub>p</sub> <50 |
| Behçet disease                                                              | M35.2        | 1361               | N/A                     | 15   | N <sub>p</sub> <50 |
| Hypersensitivity angiitis                                                   | M31.0        | 4462A              | 4461                    | 28   | N <sub>p</sub> <50 |
| Rheumatic fever incl heart disease                                          | I0[0-2 5-9]  | 39[0-8]            | 39[0-8]                 | 262  | Unclear definition |
| Acute disseminated encephalitis                                             | G04.0#       | 3235A              | 32300                   | 13   | N <sub>p</sub> <50 |
| Other acute disseminated demyelination                                      | G36          | 3410               | 34101                   | 45   | N <sub>p</sub> <50 |
| Narcolepsy and cataplexy                                                    | G47.4        | 347[0-1]           | 34700                   | 30   | N <sub>p</sub> <50 |
| Autoimmune polyglandular failure                                            | E31.0[0-1 8] | 2851               | N/A                     | 9    | N <sub>p</sub> <50 |
| Graves ophthalmopathy                                                       | H06.2*E05.9  | N/A                | N/A                     | 100  | Subtype of HYPER   |
| Autoimmune hepatitis                                                        | K75.4        | N/A                | N/A                     | 0    | N <sub>p</sub> <50 |
| Drug-induced autoimmune haemolytic anaemia                                  | D59.0        | 2830B              | 28391                   | 8    | N <sub>p</sub> <50 |
| Disorders of myoneural junction and muscle in diseases classified elsewhere | G73*         | N/A                | N/A                     | 28   | N <sub>p</sub> <50 |
| Other demyelinating diseases of the central nervous system                  | G37          | 341[1-9]           | 3410[2-9]               | 197  | Unclear definition |
| Anterior Iridocyclitis                                                      | H20.0, H20.1 | 3640, 3641         | 36400, 36402            | 1770 | Unclear definition |
| Ulcerative colitis                                                          | K51          | 556                | 5631 569                | 1747 | Subtype of IBD     |
| Crohn disease                                                               | K50          | 555                | 5630                    | 727  | Subtype of IBD     |
| Pemphigoid                                                                  | L12          | N/A                | N/A                     | 144  | Unclear definition |
| Dermatitis herpetiformis                                                    | L13.0        | 6940A 6942         | 693                     | 152  | Overlap with CD    |
| Henoch-Schönlein purpura nephritis                                          | N08.2*D69.0  | N/A                | N/A                     | 17   | N <sub>p</sub> <50 |
| Autoimmune thyroiditis                                                      | E06.3        | 2452               | N/A                     | 136  | Unclear definition |
| Linear scleroderma                                                          | L94.1        | N/A                | N/A                     | <5   | N <sub>p</sub> <50 |

81 **Figure S2.2: Inclusion and exclusion criteria of the matched case-control study**

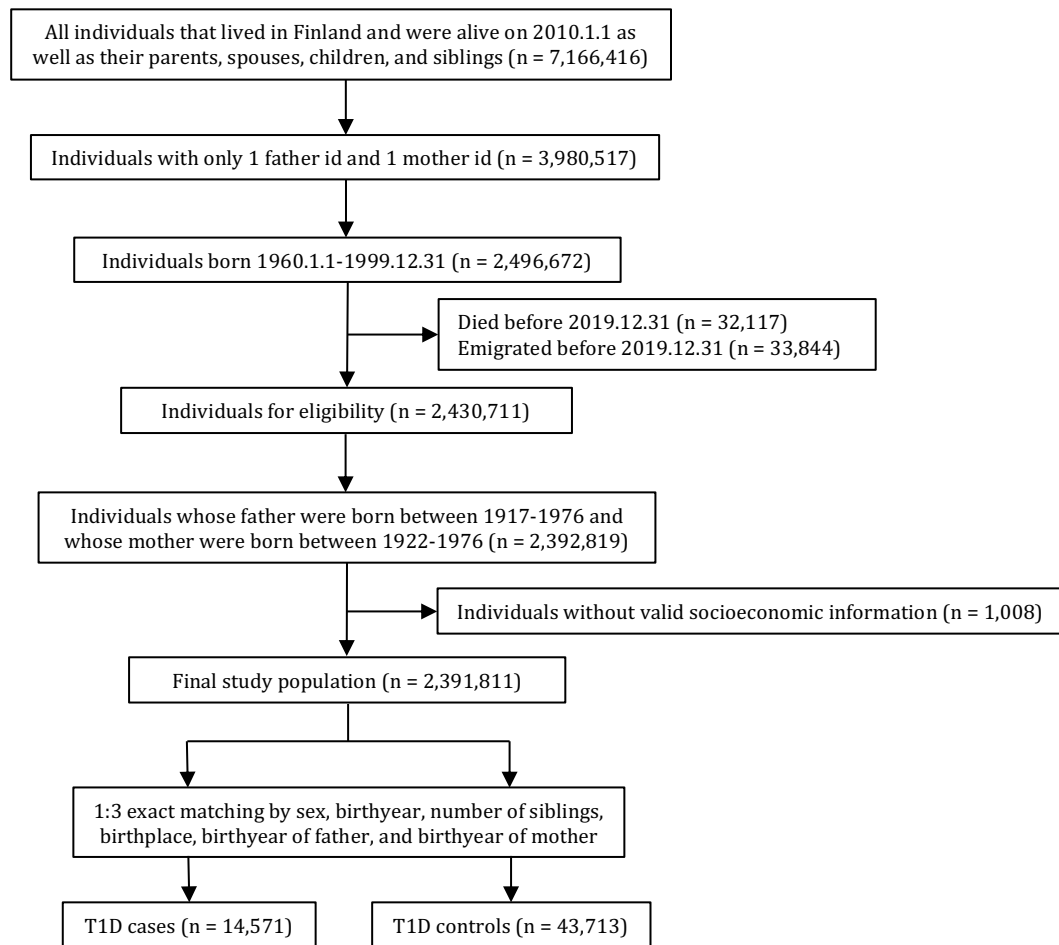

82

83

### 84 **2.3 GWAS summary statistics for LDSC and PGS analyses**

85 For each autoimmune disease, we first searched recent summary statistics with the largest sample size from European  
86 ancestry via <https://www.ebi.ac.uk/gwas/>. If nothing could be found there, we then tried to obtain the statistics from  
87 meta-analysis on FinnGen R11, UK Biobank, and Estonia via <https://metaresults-est-ukbb.finnngen.fi>, or meta-analysis  
88 on FinnGen R11 and UK Biobank via <https://metaresults-ukbb.finnngen.fi>, or analysis on FinnGen R11 via  
89 <https://results.finnngen.fi>.

90

### 91 **Table S2.3.1: The sources of GWAS summary statistics regarding different autoimmune** 92 **diseases that were used to perform linkage disequilibrium score regression (LDSC) analysis**

93 To construct non-HLA PGS in genotyped trios or full PGS in imputed trios, for each AD, we extracted publicly  
94 accessible GWAS summary statistics with the largest sample size from European ancestry. Cases/controls refer to the  
95 number of individuals affected/not affected with the disease in question.

96

| Disease                             | Source                                                                                                            | Year | Cases | Controls |
|-------------------------------------|-------------------------------------------------------------------------------------------------------------------|------|-------|----------|
| Type 1 diabetes                     | <a href="https://doi.org/10.1038/s41588-021-00880-5">https://doi.org/10.1038/s41588-021-00880-5</a>               | 2021 | 22153 | 37374    |
| Adrenocortical insufficiency        | FinnGen R11                                                                                                       |      | 1116  | 434894   |
| Autoimmune hyperthyroidism          | FinnGen R11 + UK Biobank + Estonia                                                                                |      | 4578  | 1019242  |
| Autoimmune hypothyroidism           | FinnGen R11 + UK Biobank + Estonia                                                                                |      | 87043 | 877215   |
| Autoimmune hemolytic anemia         | FinnGen R11                                                                                                       |      | 348   | 452718   |
| Allergic purpura                    | FinnGen R11                                                                                                       |      | 1031  | 446531   |
| Vitamin B12 deficiency anaemia      | FinnGen R11 + UK Biobank + Estonia                                                                                |      | 9164  | 989292   |
| Idiopathic thrombocytopenic purpura | FinnGen R11                                                                                                       |      | 968   | 446531   |
| Sarcoidosis                         | FinnGen R11 + UK Biobank + Estonia                                                                                |      | 7031  | 1062340  |
| Primary biliary cholangitis         | FinnGen R11 + UK Biobank + Estonia                                                                                |      | 1253  | 836368   |
| Celiac disease                      | <a href="https://doi.org/10.1038/ng.543">https://doi.org/10.1038/ng.543</a>                                       | 2010 | 4533  | 10750    |
| Inflammatory bowel disease          | <a href="https://doi.org/10.1038/ng.3760">https://doi.org/10.1038/ng.3760</a>                                     | 2017 | 25042 | 34915    |
| IgA nephropathy                     | FinnGen R11 + UK Biobank                                                                                          |      | 944   | 873331   |
| Ankylosing spondylitis              | <a href="https://doi.org/10.1038/ng.2667">https://doi.org/10.1038/ng.2667</a>                                     | 2013 | 9069  | 13578    |
| Mixed connective tissue disease     | FinnGen R11                                                                                                       |      | 2190  | 451543   |
| Rheumatoid arthritis                | <a href="http://dx.doi.org/10.1136/annrheumdis-2020-219065">http://dx.doi.org/10.1136/annrheumdis-2020-219065</a> | 2020 | 22628 | 288664   |
| Sjögren syndrome                    | FinnGen R11 + UK Biobank + Estonia                                                                                |      | 4323  | 1047524  |
| Systemic sclerosis                  | <a href="https://doi.org/10.1038/s41467-019-12760-y">https://doi.org/10.1038/s41467-019-12760-y</a>               | 2019 | 9095  | 17584    |
| Wegener granulomatosis              | FinnGen R11                                                                                                       |      | 486   | 439424   |
| Systemic lupus erythematosus        | <a href="https://doi.org/10.1038/ng.3434">https://doi.org/10.1038/ng.3434</a>                                     | 2015 | 7219  | 15991    |
| Guillain-Barre syndrome             | FinnGen R11                                                                                                       |      | 489   | 445865   |
| Multiple Sclerosis                  | <a href="https://doi.org/10.1038/nature10251">https://doi.org/10.1038/nature10251</a>                             | 2011 | 9772  | 17376    |
| Myasthenia gravis                   | <a href="https://doi.org/10.1073/pnas.2108672119">https://doi.org/10.1073/pnas.2108672119</a>                     | 2022 | 1873  | 36370    |
| Alopecia areata                     | FinnGen R11 + UK Biobank + Estonia                                                                                |      | 3384  | 973626   |
| Psoriasis                           | FinnGen R11 + UK Biobank + Estonia                                                                                |      | 34530 | 1029934  |
| Vitiligo                            | <a href="https://doi.org/10.1038/ng.3680">https://doi.org/10.1038/ng.3680</a>                                     | 2016 | 4680  | 39586    |

97

98

99

100

**Table S2.3.2: The sources of GWAS summary statistics regarding different autoimmune diseases that were used to construct non-HLA PGS and full PGS.**

101

102

103

104

105

106

107

108

109

To construct non-HLA PGS in genotyped trios or full PGS in imputed trios, we used GWAS summary statistics excluding FinnGen. After removing seven AIDs using only statistics from FinnGen, we used the same source of GWAS summary statistics by removing that from FinnGen in **Table S2.3.1** for the rest 19 AIDs. Non-HLA PGSs were constructed using the GWAS summary statistics excluding HLA regions. For celiac disease, the variants in HLA regions were not available in the GWAS summary statistics (**Table S2.3.1**), we used meta-analysis of UK biobank and Estonia biobank instead for full PGS construction. In the last column of **Table S2.3.2**, each row specifies which analysis uses the corresponding data source. “Non-HLA” indicates non-HLA construction. “Full” is full PGS construction.

| Disease                    | Source                                                                                              | Year | Cases | Controls | Analysis      |
|----------------------------|-----------------------------------------------------------------------------------------------------|------|-------|----------|---------------|
| Type 1 diabetes            | <a href="https://doi.org/10.1038/s41588-021-00880-5">https://doi.org/10.1038/s41588-021-00880-5</a> | 2021 | 22153 | 37374    | non-HLA; full |
| Autoimmune hyperthyroidism | UK Biobank + Estonia                                                                                |      | 1141  | 568946   | non-HLA; full |
| Autoimmune hypothyroidism  | UK Biobank + Estonia                                                                                |      | 37988 | 547440   | non-HLA; full |



|                                |                                                                                                                   |       |         |                      |
|--------------------------------|-------------------------------------------------------------------------------------------------------------------|-------|---------|----------------------|
| Vitamin B12 deficiency anaemia | UK Biobank + Estonia                                                                                              | 5182  | 556285  | non-HLA; full        |
| Sarcoidosis                    | UK Biobank + Estonia                                                                                              | 2177  | 615817  | non-HLA; full        |
| Primary biliary cholangitis    | UK Biobank + Estonia                                                                                              | 562   | 498082  | non-HLA; full        |
| Coeliac disease                | <a href="https://doi.org/10.1038/ng.543">https://doi.org/10.1038/ng.543</a>                                       | 2010  | 4533    | 10750 non-HLA        |
| Coeliac disease                | UK Biobank + Estonia                                                                                              | 4533  | 10750   | full                 |
| Inflammatory bowel disease     | <a href="https://doi.org/10.1038/ng.3760">https://doi.org/10.1038/ng.3760</a>                                     | 2017  | 25042   | 34915 non-HLA; full  |
| IgA nephropathy                | UK Biobank                                                                                                        | 218   | 420324  | non-HLA; full        |
| Ankylosing spondylitis         | <a href="https://doi.org/10.1038/ng.2667">https://doi.org/10.1038/ng.2667</a>                                     | 2013  | 9069    | 13578 non-HLA; full  |
| Rheumatoid arthritis           | <a href="http://dx.doi.org/10.1136/annrheumdis-2020-219065">http://dx.doi.org/10.1136/annrheumdis-2020-219065</a> | 2020  | 22628   | 288664 non-HLA; full |
| Sjögren syndrome               | UK Biobank + Estonia                                                                                              | 1342  | 608100  | non-HLA; full        |
| Systemic sclerosis             | <a href="https://doi.org/10.1038/s41467-019-12760-y">https://doi.org/10.1038/s41467-019-12760-y</a>               | 2019  | 9095    | 17584 non-HLA; full  |
| Systemic lupus erythematosus   | <a href="https://doi.org/10.1038/ng.3434">https://doi.org/10.1038/ng.3434</a>                                     | 2015  | 7219    | 15991 non-HLA; full  |
| Multiple Sclerosis             | <a href="https://doi.org/10.1038/nature10251">https://doi.org/10.1038/nature10251</a>                             | 2011  | 9772    | 17376 non-HLA; full  |
| Myasthenia gravis              | <a href="https://doi.org/10.1073/pnas.2108672119">https://doi.org/10.1073/pnas.2108672119</a>                     | 2022  | 1873    | 36370 non-HLA; full  |
| Alopecia areata                | UK Biobank + Estonia                                                                                              | 3384  | 973626  | non-HLA; full        |
| Psoriasis                      | UK Biobank + Estonia                                                                                              | 34530 | 1029934 | non-HLA; full        |
| Vitiligo                       | <a href="https://doi.org/10.1038/ng.3680">https://doi.org/10.1038/ng.3680</a>                                     | 2016  | 4680    | 39586 non-HLA; full  |

110

111

## 112 2.4 Study design for HLA analyses

113 There are two analyses in this section. We first conducted a haplotype based GWAS in HLA region to understand  
 114 how T1D correlated with other AIDs via HLA haplotypes. Then we investigated whether HLA genetic liability to  
 115 other ADs have a causal effect on T1D using our novel HLA PGS method.

116

### 117 Figure S2.4.1: Design of the HLA haplotype analysis

118 We applied expectation-maximization algorithm to construct possible haplotypes and a logistic regression used age,  
 119 sex, and the first ten principal components (PCs) to predict T1D status for covariate adjustment. We then used what  
 120 we obtained to calculate haplotype score and filter reliable haplotypes through multiple testing corrections. We next  
 121 computed Pearson correlation for each pair of remaining haplotypes and removed one of them if the Pearson  
 122 correlation<sup>2</sup> is greater than 0.7. Finally, we derived associations between the haplotypes remained and the AIDs and  
 123 plotted the summary statistics of the associations via a heatmap.

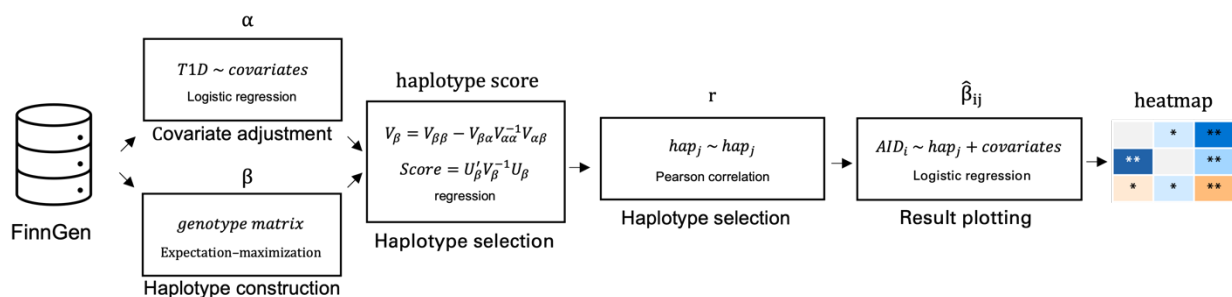

124

125 **Figure S2.4.2: Design of the polygenic risk analysis of HLA-PGSs with 26 AIDs**

126 Panel A shows that we extracted data from FinnGen and *randomly* divided all individuals into ten groups. In a 10-  
 127 iteration for loop, each group was used as target set (in orange) while the remaining nine groups (in light blue) were  
 128 used for model training. Panel B depicts the design of the PGS analysis. In each iteration, a weighted ridge classifier  
 129 was applied on training set to derive weights ( $\hat{w}_j$ ) for PGSs for each AID. Then we calculated PGSs for each AID  
 130 using the target set and calculated partial correlation ( $\rho$ ) between the PGSs and the AID itself for disease selection.  
 131 For the diseases remained, we associated the PGSs with T1D, meta-analyzed the association statistics from the ten  
 132 subgroups and plotted the results.

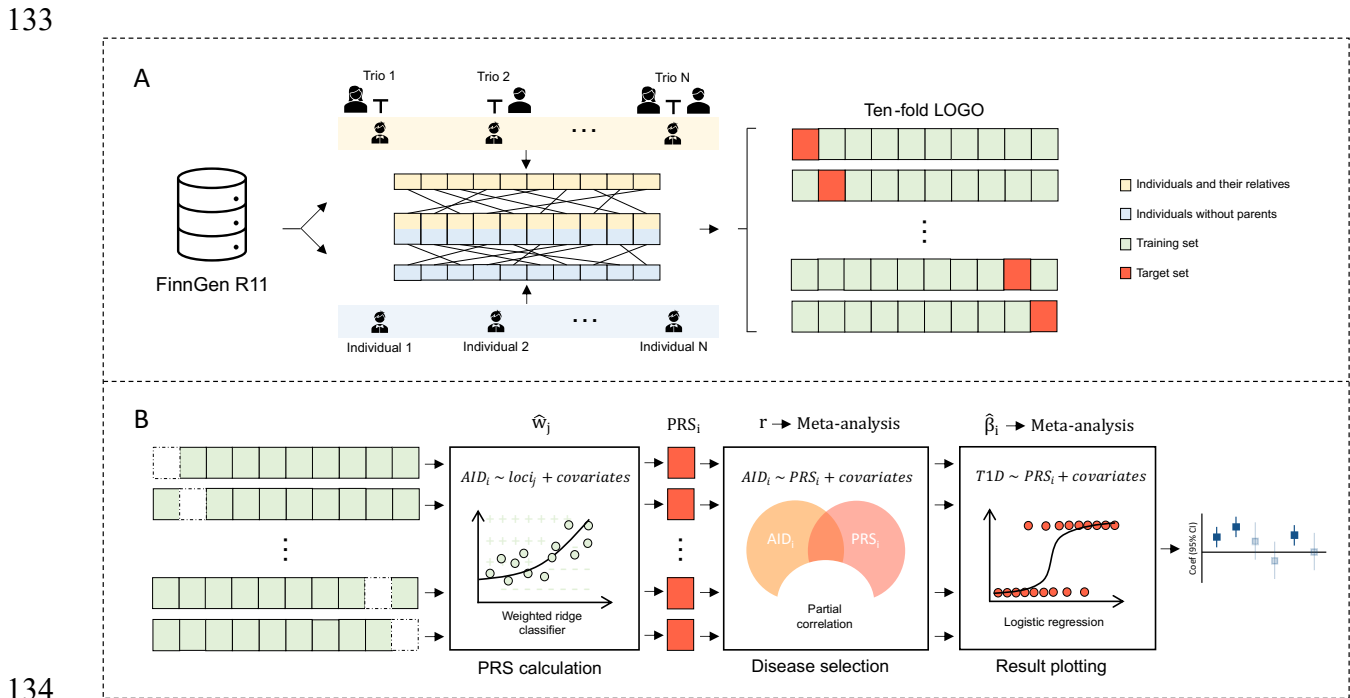

134

135 We also proposed a novel PGS method to construct PGS for T1D and other AIDs specific for HLA regions using  
 136 FinnGen R11.

137 We adopted a tenfold leave-one-group-out (LOGO) meta-analysis method (**Figure S2.4.2**) to avoid overfitting by  
 138 making sure that the sample used for estimating the weights does not include individuals from the PGS prediction  
 139 sample. We randomly divided the study population into groups.

140 For each AID, we used 9 groups (training set) to calculate the association between all HLA alleles and the AID with  
 141 weighted ridge classifier, which can address high polymorphism and high LD in the HLA region by imposing a penalty  
 142 on the size of the coefficients. The model also included age, sex, and the first ten PCs as covariates. The left-out group  
 143 (validation set) was used to calculate the PGS, as a weighted sum of all imputed HLA alleles (allele dosage multiplied  
 144 by its weight from the corresponding training set). After PGS normalization, we first measured partial correlation  
 145 between each AID and its PGS, with the effect of the covariates removed. We dropped all the AIDs whose partial  
 146 correlation with PGS for the AIDs themselves were lower than 2%. With this step, we filtered out diseases with low  
 147 sample size or with weak HLA signal. Next, we conducted logistic linear regression, adjusting for age, sex, and the  
 148 first ten PCs, to establish the association between PGS and T1D. The Bonferroni correction was applied to account  
 149 for multiple comparisons.

150 We repeated this process 10 times by using each different group as the validation set. The association results obtained  
 151 from each of the ten validation sets were meta-analyzed using the inverse variance method.

152 **3. Supplementary results**

153 **3.1 Basic statistics and demographic data**

154 **3.1.1 Basic estimates in FinRegistry and FinnGen**

155 Prevalence in Table S3.1.1 stands for unadjusted life-time prevalence. The estimates of FinRegistry were calculated based on index persons whereas those of  
 156 FinnGen were from the whole population in FinnGen.

157

158 **Table S3.1.1: Basic estimates from FinRegistry and FinnGen**

| Disease                             | FinRegistry |                | FinnGen    |       | FinnGen genotyped trios |                |
|-------------------------------------|-------------|----------------|------------|-------|-------------------------|----------------|
|                                     | Prevalence  | Parental cases | Prevalence | Cases | Prevalence              | Parental cases |
| Type 1 diabetes                     | 0.33 %      | 385            | 0.82 %     | 3668  | 0.41 %                  | 104            |
| Adrenocortical insufficiency        | 0.14 %      | 166            | 0.25 %     | 1100  | 0.26 %                  | 65             |
| Autoimmune hyperthyroidism          | 0.54 %      | 635            | 0.76 %     | 3404  | 0.64 %                  | 160            |
| Autoimmune hypothyroidism           | 9.85 %      | 11485          | 10.81 %    | 48113 | 13.13 %                 | 3299           |
| Autoimmune hemolytic anemia         | 0.05 %      | 55             | 0.08 %     | 341   | 0.09 %                  | 23             |
| Allergic purpura                    | 0.13 %      | 154            | 0.23 %     | 1008  | 0.18 %                  | 45             |
| Vitamin B12 deficiency anaemia      | 0.83 %      | 962            | 0.85 %     | 3782  | 1.38 %                  | 346            |
| Idiopathic thrombocytopenic purpura | 0.16 %      | 186            | 0.21 %     | 955   | 0.20 %                  | 50             |
| Sarcoidosis                         | 0.95 %      | 1104           | 1.08 %     | 4800  | 1.27 %                  | 319            |
| Primary biliary cholangitis         | 0.13 %      | 157            | 0.15 %     | 688   | 0.21 %                  | 52             |
| Coeliac disease                     | 0.97 %      | 1129           | 1.01 %     | 4497  | 1.31 %                  | 330            |
| Inflammatory bowel disease          | 1.91 %      | 2221           | 3.08 %     | 13709 | 2.75 %                  | 690            |
| IgA nephropathy                     | 0.08 %      | 89             | 0.16 %     | 719   | 0.09 %                  | 23             |
| Ankylosing spondylitis              | 0.58 %      | 680            | 0.77 %     | 3431  | 0.74 %                  | 187            |
| Mixed connective tissue disease     | 0.32 %      | 374            | 0.48 %     | 2159  | 0.51 %                  | 128            |
| Rheumatoid arthritis                | 2.77 %      | 3224           | 3.24 %     | 14426 | 4.04 %                  | 1014           |
| Sjögren syndrome                    | 0.50 %      | 585            | 0.66 %     | 2938  | 0.82 %                  | 207            |
| Systemic sclerosis                  | 0.10 %      | 118            | 0.17 %     | 759   | 0.21 %                  | 54             |

|                              |        |      |        |       |        |     |
|------------------------------|--------|------|--------|-------|--------|-----|
| Wegener granulomatosis       | 0.07 % | 86   | 0.11 % | 475   | 0.07 % | 18  |
| Systemic lupus erythematosus | 0.18 % | 210  | 0.27 % | 1184  | 0.20 % | 51  |
| Guillain-Barre syndrome      | 0.10 % | 120  | 0.11 % | 482   | 0.14 % | 34  |
| Multiple Sclerosis           | 0.40 % | 461  | 0.59 % | 2 606 | 0.48 % | 120 |
| Myasthenia gravis            | 0.09 % | 103  | 0.11 % | 489   | 0.10 % | 25  |
| Alopecia areata              | 0.15 % | 175  | 0.19 % | 856   | 0.10 % | 25  |
| Psoriasis                    | 2.13 % | 2486 | 2.54 % | 11322 | 2.67 % | 671 |
| Vitiligo                     | 0.06 % | 65   | 0.08 % | 337   | 0.06 % | 16  |

160 **3.1.2 Socio-demographic characteristics in FinRegistry**

161 To ensure that cases and the controls were comparable, we analyzed the socio-demographic variables to determine  
 162 differences between the two groups. We used Cohen’s D<sup>50</sup> for ordinal variables and Chi-squared test for categorical  
 163 variables. Details for the definition of socio-demographic status can be found from <https://www.stat.fi/en/luokitukset/>.

164 **Table S3.1.2: Socio-demographic characteristics of cases and controls in the matched case-**  
 165 **control study**

|                                                    | Cases<br>N = 14,915 | Controls<br>N = 44,745 | Cohen’s D | $\chi^2$ (P-value) |
|----------------------------------------------------|---------------------|------------------------|-----------|--------------------|
| <b>Year of birth (Child): mean</b>                 | 1983.08             | 1983.02                | 0.0056    |                    |
| <b>Year of birth (Father): mean</b>                | 1952.29             | 1952.29                | -0.0003   |                    |
| <b>Year of birth (Mother): mean</b>                | 1954.56             | 1954.56                | -0.0003   |                    |
| <b>Number of siblings: mean</b>                    | 1.68                | 1.69                   | -0.0062   |                    |
| <b>Socio-economic status: count (%)</b>            |                     |                        |           |                    |
| Self-employed, agriculture                         | 142 (1.0)           | 478 (1.1)              |           |                    |
| Self-employed, non-agriculture                     | 647 (4.4)           | 2424 (5.5)             |           |                    |
| Upper-level employees                              | 2293 (15.7)         | 7206 (16.5)            |           | 0.4008             |
| Lower-level employees                              | 3865 (26.5)         | 11589 (26.5)           |           | (0.9997)           |
| Manual workers                                     | 3563 (24.5)         | 10905 (24.9)           |           |                    |
| Students                                           | 1838 (12.6)         | 5388 (12.3)            |           |                    |
| Pensioners                                         | 611 (4.2)           | 1303 (3)               |           |                    |
| Unknown                                            | 1611 (11.1)         | 4416 (10.1)            |           |                    |
| <b>Marital status: count (%)</b>                   |                     |                        |           |                    |
| Ever married                                       | 8835 (60.6)         | 25748 (58.9)           |           | 0.0102             |
| Never married                                      | 5736 (39.4)         | 17965 (41.1)           |           | (0.9196)           |
| <b>Number of children: mean</b>                    | 0.92                | 1.04                   | -0.0875   |                    |
| <b>Occupation: count (%)</b>                       |                     |                        |           |                    |
| Armed forces                                       | 24 (0.2)            | 170 (0.4)              |           |                    |
| Managers                                           | 300 (2.1)           | 1207 (2.8)             |           |                    |
| Professionals                                      | 2256 (15.5)         | 6862 (15.7)            |           |                    |
| Technicians and associate professionals            | 2169 (14.9)         | 6198 (14.2)            |           |                    |
| Clerical and support workers                       | 773 (5.3)           | 2223 (5.1)             |           | 0.3948             |
| Service and sales workers                          | 2776 (19.1)         | 8445 (19.3)            |           | (1.0)              |
| Skilled agricultural, forestry and fishery workers | 249 (1.7)           | 803 (1.8)              |           |                    |
| Craft and related trades workers                   | 1758 (12.1)         | 4859 (11.1)            |           |                    |
| Plant and machine operators, and assemblers        | 1050 (7.2)          | 3775 (8.6)             |           |                    |
| Elementary occupations                             | 1067 (7.3)          | 3179 (7.3)             |           |                    |
| Unknown                                            | 2149 (14.7)         | 5991 (13.7)            |           |                    |
| <b>Education level: count (%)</b>                  |                     |                        |           |                    |
| Education possibly ongoing                         | 6251 (42.9)         | 18662 (42.7)           |           |                    |
| Upper secondary education                          | 3703 (25.4)         | 10962 (25.1)           |           |                    |
| Specialist vocational education                    | 133 (0.9)           | 448 (1)                |           | 0.1736             |
| Short-cycle tertiary education                     | 816 (5.6)           | 2005 (4.6)             |           | (1.0)              |
| First-cycle higher education                       | 1557 (10.7)         | 4679 (10.7)            |           |                    |
| Second-cycle higher education                      | 1268 (8.7)          | 4200 (9.6)             |           |                    |
| Third-cycle higher education                       | 116 (0.8)           | 351 (0.8)              |           |                    |
| Level of education unknown or missing              | 727 (5.0)           | 2405 (5.5)             |           |                    |
| <b>Mother tongue: count (%)</b>                    |                     |                        |           |                    |
| Finnish                                            | 13,746 (94.3)       | 40,942 (93.7)          |           | 0.2934             |
| Swedish                                            | 715 (4.9)           | 2,146 (4.9)            |           | (0.9613)           |
| Russian                                            | 36 (0.3)            | 159 (0.4)              |           |                    |
| Others                                             | 74 (0.5)            | 466 (1.1)              |           |                    |

168 **3.2 Registry-based analyses**

169 **3.2.1: Matched case-control study**

170 One of our main analyses is matched case-control study using T1D before age of 40. We also conducted a  
 171 sensitivity analysis using T1D before age of 20 as comparison. In the main analysis, we had 14,571 T1D  
 172 cases in offspring and 43,713 controls. In the sensitivity analysis, we included 10,165 cases and 30,415  
 173 controls. We reported number of cases, odds ratio (OR) with 95% confidence interval (CI) and P-values in the tables  
 174 below as results.  
 175

176 **Table S3.2.1.1: Finnish population-based case-control study using T1D before age of 40 as**  
 177 **diagnosis code**  
 178

| <b>Disease</b>                      | <b>N (%) in case group</b> | <b>N (%) in control group</b> | <b>OR (95% CI)</b> | <b>P-value</b> |
|-------------------------------------|----------------------------|-------------------------------|--------------------|----------------|
| Type 1 diabetes                     | 265 (0.91)                 | 120 (0.14)                    | 6.77 [5.44, 8.42]  | 3.75E-66       |
| Autoimmune hypothyroidism           | 3675 (12.61)               | 7810 (8.93)                   | 1.53 [1.46, 1.60]  | 4.75E-73       |
| Coeliac disease                     | 465 (1.6)                  | 664 (0.76)                    | 2.14 [1.90, 2.42]  | 2.54E-35       |
| Rheumatoid arthritis                | 1043 (3.58)                | 2181 (2.49)                   | 1.48 [1.37, 1.60]  | 1.84E-23       |
| Vitamin B12 deficiency anaemia      | 350 (1.2)                  | 612 (0.7)                     | 1.76 [1.54, 2.02]  | 1.40E-16       |
| Sarcoidosis                         | 356 (1.22)                 | 748 (0.86)                    | 1.45 [1.28, 1.65]  | 1.13E-08       |
| Autoimmune hyperthyroidism          | 204 (0.7)                  | 431 (0.49)                    | 1.42 [1.20, 1.68]  | 4.32E-05       |
| Mixed connective tissue disease     | 126 (0.43)                 | 248 (0.28)                    | 1.54 [1.24, 1.91]  | 8.47E-05       |
| Sjögren syndrome                    | 179 (0.61)                 | 406 (0.46)                    | 1.33 [1.11, 1.59]  | 1.61E-03       |
| Vitiligo                            | 27 (0.09)                  | 38 (0.04)                     | 2.09 [1.20, 3.63]  | 1.94E-03       |
| Primary biliary cholangitis         | 56 (0.19)                  | 101 (0.12)                    | 1.66 [1.20, 2.31]  | 2.42E-03       |
| Autoimmune hemolytic anemia         | 23 (0.08)                  | 32 (0.04)                     | 2.20 [1.28, 3.78]  | 4.42E-03       |
| Myasthenia gravis                   | 36 (0.12)                  | 67 (0.08)                     | 1.65 [1.10, 2.48]  | 1.51E-02       |
| Adrenocortical insufficiency        | 53 (0.18)                  | 113 (0.13)                    | 1.42 [1.02, 1.97]  | 3.51E-02       |
| Psoriasis                           | 665 (2.28)                 | 1821 (2.08)                   | 1.10 [1.01, 1.21]  | 3.53E-02       |
| Systemic lupus erythematosus        | 63 (0.22)                  | 147 (0.17)                    | 1.29 [0.96, 1.73]  | 9.18E-02       |
| IgA nephropathy                     | 28 (0.1)                   | 61 (0.07)                     | 1.40 [0.89, 2.18]  | 1.43E-01       |
| Systemic sclerosis                  | 36 (0.12)                  | 82 (0.09)                     | 1.33 [0.90, 1.97]  | 1.55E-01       |
| Alopecia areata                     | 51 (0.18)                  | 124 (0.14)                    | 1.24 [0.89, 1.72]  | 1.99E-01       |
| Guillain-Barre syndrome             | 35 (0.12)                  | 85 (0.1)                      | 1.25 [0.84, 1.86]  | 2.76E-01       |
| Allergic purpura                    | 44 (0.15)                  | 110 (0.13)                    | 1.20 [0.85, 1.71]  | 2.98E-01       |
| Inflammatory bowel disease          | 573 (1.97)                 | 1648 (1.89)                   | 1.05 [0.95, 1.16]  | 3.19E-01       |
| Wegener granulomatosis              | 25 (0.09)                  | 61 (0.07)                     | 1.24 [0.78, 1.98]  | 3.66E-01       |
| Ankylosing spondylitis              | 161 (0.55)                 | 519 (0.59)                    | 0.93 [0.78, 1.11]  | 4.11E-01       |
| Idiopathic thrombocytopenic purpura | 50 (0.17)                  | 136 (0.16)                    | 1.10 [0.80, 1.53]  | 5.50E-01       |
| Multiple Sclerosis                  | 111 (0.38)                 | 350 (0.4)                     | 0.94 [0.76, 1.17]  | 5.91E-01       |

179

180

181 **Table S3.2.1.2: Finnish population-based case-control study using T1D before age of 20 as**  
 182 **diagnosis code**  
 183

| <b>Disease</b>                      | <b>N (%) in case group</b> | <b>N (%) in control group</b> | <b>OR (95% CI)</b> | <b>P-value</b> |
|-------------------------------------|----------------------------|-------------------------------|--------------------|----------------|
| Type 1 diabetes                     | 171 (0.84)                 | 48 (0.08)                     | 10.9 [7.90, 15.04] | 6.81E-48       |
| Autoimmune hypothyroidism           | 2396 (11.79)               | 5014 (8.24)                   | 1.55 [1.46, 1.64]  | 2.31E-52       |
| Coeliac disease                     | 345 (1.7)                  | 485 (0.8)                     | 2.18 [1.90, 2.51]  | 1.39E-27       |
| Rheumatoid arthritis                | 622 (3.06)                 | 1276 (2.1)                    | 1.50 [1.36, 1.66]  | 1.78E-15       |
| Sarcoidosis                         | 168 (0.83)                 | 337 (0.55)                    | 1.48 [1.27, 1.73]  | 7.65E-07       |
| Vitamin B12 deficiency anaemia      | 244 (1.2)                  | 500 (0.82)                    | 1.50 [1.25, 1.81]  | 2.08E-05       |
| Autoimmune hyperthyroidism          | 155 (0.76)                 | 330 (0.54)                    | 1.41 [1.16, 1.71]  | 4.57E-04       |
| Mixed connective tissue disease     | 88 (0.43)                  | 168 (0.28)                    | 1.59 [1.22, 2.06]  | 4.98E-04       |
| Systemic lupus erythematosus        | 101 (0.5)                  | 281 (0.46)                    | 1.77 [1.25, 2.51]  | 1.41E-03       |
| Primary biliary cholangitis         | 23 (0.11)                  | 39 (0.06)                     | 1.79 [1.17, 2.73]  | 6.75E-03       |
| Vitiligo                            | 35 (0.17)                  | 59 (0.1)                      | 1.77 [1.05, 2.96]  | 3.06E-02       |
| Alopecia areata                     | 8 (0.04)                   | 20 (0.03)                     | 1.47 [1.00, 2.17]  | 4.94E-02       |
| Psoriasis                           | 21 (0.1)                   | 52 (0.09)                     | 1.09 [0.98, 1.22]  | 1.18E-01       |
| Adrenocortical insufficiency        | 38 (0.19)                  | 85 (0.14)                     | 1.35 [0.92, 1.98]  | 1.25E-01       |
| IgA nephropathy                     | 448 (2.2)                  | 1237 (2.03)                   | 1.43 [0.85, 2.41]  | 1.74E-01       |
| Idiopathic thrombocytopenic purpura | 50 (0.25)                  | 86 (0.14)                     | 1.32 [0.88, 1.97]  | 1.82E-01       |
| Ankylosing spondylitis              | 21 (0.1)                   | 44 (0.07)                     | 0.87 [0.70, 1.09]  | 2.21E-01       |
| Systemic sclerosis                  | 25 (0.12)                  | 57 (0.09)                     | 1.33 [0.83, 2.12]  | 2.37E-01       |
| Inflammatory bowel disease          | 38 (0.19)                  | 78 (0.13)                     | 1.05 [0.94, 1.18]  | 3.57E-01       |
| Wegener granulomatosis              | 25 (0.12)                  | 65 (0.11)                     | 1.33 [0.69, 2.57]  | 3.96E-01       |
| Myasthenia gravis                   | 31 (0.15)                  | 80 (0.13)                     | 1.21 [0.73, 2.02]  | 4.61E-01       |
| Allergic purpura                    | 432 (2.12)                 | 1239 (2.04)                   | 1.16 [0.77, 1.76]  | 4.71E-01       |
| Sjögren syndrome                    | 13 (0.06)                  | 38 (0.06)                     | 1.08 [0.86, 1.36]  | 5.10E-01       |
| Guillain-Barre syndrome             | 104 (0.51)                 | 361 (0.59)                    | 1.16 [0.73, 1.84]  | 5.35E-01       |
| Autoimmune hemolytic anemia         | 34 (0.17)                  | 78 (0.13)                     | 1.20 [0.53, 2.73]  | 6.58E-01       |
| Multiple Sclerosis                  | 89 (0.44)                  | 275 (0.45)                    | 0.98 [0.77, 1.25]  | 8.79E-01       |

184

185 **Figure S3.2.2: Association between parental AIDs and T1D in children by sex**

186 Panel A shows how T1D among children is associated with paternal AIDs and maternal AIDs. Panel B is the  
 187 associations stratified by sex of children. Only parental AIDs significantly associated with T1D (**Fig.2**) are  
 188 displayed.  
 189

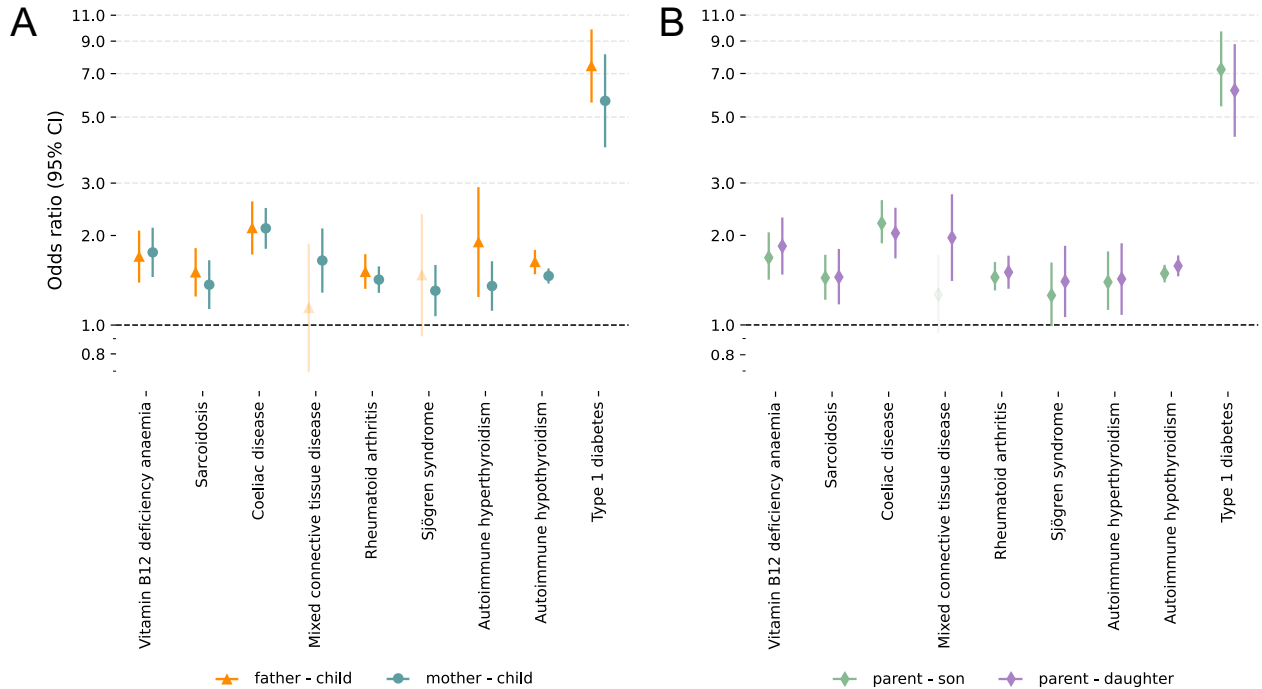

190  
 191  
 192

193 **3.2.3 Association between parental AIDs and age of T1D onset in children by sex**

194 We then assessed how parental AIDs affected age at onset of T1D in offspring. We excluded individuals without onset  
 195 age. The median age at diagnosis (the first record of the ICD-code) of T1D was 12.7 years (IQR=[8.0,20.0]) with  
 196 men (13.6 years, IQR=[8.6,21.1]) being older than women (11.6 years, IQR=[7.3,18.2]). In a multivariate regression  
 197 analysis adjusted by all the matching factors, only parental T1D were significantly ( $P < 0.05/9$ ) associated with the age  
 198 of T1D onset in offspring (**Table S3.2.3.1**). The observed onset age among individuals with T1D was 1.57 [0.54-  
 199 2.60] ( $P = 0.0028$ ) years younger if at least one parent had T1D. We further observed that this association mainly came  
 200 from the association between paternal T1D and T1D onset among sons while mothers with T1D had no impact on the  
 201 T1D onset of their offspring (**Table S3.2.3.2**). To test if these associations could be biased by potential data structure  
 202 due to e.g., average age of onset for different diseases, the change of ICD definitions and gradually improved  
 203 healthcare policies over the years, we split the data by children's birthyear by median of their birthyear (1960-1979  
 204 and 1980-1999). We conducted the same analysis and obtained consistent results (**Table S3.2.3.3**).  
 205



206 **Table 3.2.3.1: Association between the age of T1D onset in offspring and parental AID**  
 207 **status**

| Parental AID                    | # AID cases | log(OR) [95% CI]     | P      |
|---------------------------------|-------------|----------------------|--------|
| Type 1 diabetes                 | 254         | -1.57 [-2.6, -0.54]  | 0.0028 |
| Autoimmune hypothyroidism       | 3469        | -0.06 [-0.37, 0.26]  | 0.7264 |
| Coeliac disease                 | 458         | -0.8 [-1.57, -0.04]  | 0.0399 |
| Rheumatoid arthritis            | 1017        | -0.55 [-1.08, -0.03] | 0.0397 |
| Sarcoidosis                     | 333         | -0.32 [-1.22, 0.57]  | 0.4803 |
| Vitamin B12 deficiency anemia   | 357         | 0.88 [0, 1.76]       | 0.0502 |
| Autoimmune hyperthyroidism      | 200         | -1.15 [-2.31, 0]     | 0.0495 |
| Mixed connective tissue disease | 126         | -1.02 [-2.46, 0.42]  | 0.1666 |
| Sjögren syndrome                | 176         | 0.28 [-0.94, 1.51]   | 0.6483 |

208  
 209  
 210 **Table 3.2.3.2: Relationship between the age of T1D onset in offspring and parental T1D**  
 211 **status stratified by sex of parents and offspring**

| Relationship      | # Parental T1D cases | log(OR) [95% CI]     | P      |
|-------------------|----------------------|----------------------|--------|
| father – daughter | 60                   | -1.88 [-3.92, 0.16]  | 0.0704 |
| mother – daughter | 34                   | -0.4 [-3.1, 2.3]     | 0.7727 |
| father – son      | 113                  | -1.85 [-3.41, -0.29] | 0.0201 |
| mother – son      | 49                   | -1.17 [-3.53, 1.18]  | 0.3277 |

212  
 213 **Table 3.2.3.3: Relationship between the age of T1D onset in offspring and parental T1D**  
 214 **status stratified by sex of parents and offspring with the offspring's birthyear within 1980-**  
 215 **1999**

| Relationship      | # Parental T1D cases | log(OR) [95% CI]     | P      |
|-------------------|----------------------|----------------------|--------|
| parent – child    | 242                  | -1.45 [-2.35, -0.54] | 0.0017 |
| father – daughter | 56                   | -1.59 [-3.41, 0.22]  | 0.0851 |
| mother – daughter | 33                   | -0.03 [-2.38, 2.32]  | 0.9832 |
| father – son      | 109                  | -1.76 [-3.13, -0.39] | 0.0118 |
| mother – son      | 47                   | -1.42 [-3.49, 0.64]  | 0.1774 |

216

217 **3.3 Shared genetic background in population**  
 218 **3.3.1 Analyses in HLA regions – Haplotype analysis**

219 **Table S3.3.1.1: Summary statistics of haplotype-specific score tests for T1D**

| Haplotype                        | Frequency  | Haplotype score | P-value <sub>score</sub> |
|----------------------------------|------------|-----------------|--------------------------|
| DQA1*01:02-DQB1*06:02-DRB1*15:01 | 0.14112373 | -29.639428      | 1.00E-193                |
| DQA1*01:03-DQB1*06:03-DRB1*13:01 | 0.08985561 | -16.891367      | 1.00E-64                 |
| DQA1*01:01-DQB1*05:01-DRB1*01:01 | 0.18825249 | -15.024028      | 1.00E-51                 |
| DQA1*05:05-DQB1*03:01-DRB1*11:01 | 0.0362712  | -13.010508      | 1.00E-38                 |
| DQA1*02:01-DQB1*03:03-DRB1*07:01 | 0.01537059 | -9.2391112      | 1.00E-20                 |
| DQA1*05:05-DQB1*03:01-DRB1*12:01 | 0.02637552 | -7.8918718      | 3.00E-15                 |
| DQA1*02:01-DQB1*02:02-DRB1*07:01 | 0.04085991 | -6.1855557      | 6.19E-10                 |
| DQA1*01:05-DQB1*05:01-DRB1*10:01 | 0.00854685 | -5.8481741      | 4.97E-09                 |
| DQA1*01:04-DQB1*05:03-DRB1*14:54 | 0.00615272 | -5.7002677      | 1.20E-08                 |
| DQA1*03:03-DQB1*03:01-DRB1*04:08 | 0.01166135 | -5.2422534      | 1.59E-07                 |
| DQA1*03:02-DQB1*03:03-DRB1*13:01 | 0.00685471 | -5.1770243      | 2.25E-07                 |
| DQA1*04:01-DQB1*04:02-DRB1*08:01 | 0.09734738 | -3.0819368      | 2.05E-03                 |
| DQA1*01:02-DQB1*05:02-DRB1*16:01 | 0.00813475 | -2.4329221      | 1.50E-02                 |
| DQA1*03:03-DQB1*03:01-DRB1*04:01 | 0.01094099 | -2.3841454      | 1.71E-02                 |
| DQA1*03:02-DQB1*03:03-DRB1*09:01 | 0.03477909 | -1.2612753      | 2.07E-01                 |
| DQA1*01:02-DQB1*06:04-DRB1*13:02 | 0.03329611 | 4.75611941      | 1.97E-06                 |
| DQA1*03:01-DQB1*03:02-DRB1*04:04 | 0.04202424 | 18.4916972      | 1.00E-76                 |
| DQA1*05:01-DQB1*02:01-DRB1*03:01 | 0.10353824 | 26.2203348      | 1.00E-151                |
| DQA1*03:01-DQB1*03:02-DRB1*04:01 | 0.07418242 | 62.7742651      | 1.00E-858                |

220

221

222 **Table S3.3.1.2: Association between the six haplotypes and T1D**

223 The six haplotypes were selected from **S3.3.1.1** ( $P > 1.00 \times 10^{-50}$ ). The first three haplotypes are positively associated  
 224 with the risk of developing T1D while the last three ones are protective against T1D. Haplotype scores were calculated  
 225 to present the association levels of the given haplotypes and T1D status.

| Haplotype                               | OR <sub>T1D</sub> | P-value <sub>T1D</sub>   |
|-----------------------------------------|-------------------|--------------------------|
| <b>DRB1*04:01-DQA1*03:01-DQB1*03:02</b> | 7.54 [7.00, 8.13] | $< 1.0 \times 10^{-602}$ |
| <b>DRB1*03:01-DQA1*05:01-DQB1*02:01</b> | 2.48 [2.30, 2.68] | $3.56 \times 10^{-122}$  |
| <b>DRB1*04:04-DQA1*03:01-DQB1*03:02</b> | 2.28 [2.07, 2.52] | $5.13 \times 10^{-62}$   |
| <b>DRB1*01:01-DQA1*01:01-DQB1*05:01</b> | 0.52 [0.48, 0.57] | $2.87 \times 10^{-47}$   |
| <b>DRB1*13:01-DQA1*01:03-DQB1*06:03</b> | 0.29 [0.25, 0.34] | $8.71 \times 10^{-52}$   |
| <b>DRB1*15:01-DQA1*01:02-DQB1*06:02</b> | 0.06 [0.04, 0.07] | $1.99 \times 10^{-106}$  |

226

227 **Table S3.3.1.3: Associations between HLA haplotypes and AIDs**

| Haplotype                        | Disease                         | Odds ratio [95%CI]   | P-value   | N <sub>haplotype</sub> | N <sub>case</sub> | N <sub>case in haplotype</sub> |
|----------------------------------|---------------------------------|----------------------|-----------|------------------------|-------------------|--------------------------------|
| DRB1*03:01-DQA1*05:01-DQB1*02:01 | Coeliac disease                 | 15.84 [14.57, 17.21] | 1.0E-920  | 64362                  | 3318              | 2595                           |
| DRB1*04:01-DQA1*03:01-DQB1*03:02 | Type 1 diabetes                 | 6.89 [6.38, 7.43]    | 1.0E-603  | 48292                  | 3108              | 1818                           |
| DRB1*04:01-DQA1*03:01-DQB1*03:02 | Rheumatoid arthritis            | 1.92 [1.84, 2.01]    | 3.06E-172 | 48292                  | 11036             | 2571                           |
| DRB1*15:01-DQA1*01:02-DQB1*06:02 | Multiple Sclerosis              | 2.83 [2.58, 3.1]     | 4.14E-110 | 87730                  | 1873              | 946                            |
| DRB1*03:01-DQA1*05:01-DQB1*02:01 | Type 1 diabetes                 | 2.39 [2.22, 2.58]    | 4.23E-110 | 64362                  | 3108              | 1190                           |
| DRB1*15:01-DQA1*01:02-DQB1*06:02 | Type 1 diabetes                 | 0.06 [0.05, 0.08]    | 1.19E-102 | 87730                  | 3108              | 59                             |
| DRB1*03:01-DQA1*05:01-DQB1*02:01 | Autoimmune hyperthyroidism      | 2.43 [2.24, 2.64]    | 6.66E-101 | 64362                  | 2534              | 939                            |
| DRB1*01:01-DQA1*01:01-DQB1*05:01 | Coeliac disease                 | 0.42 [0.38, 0.46]    | 3.70E-82  | 114609                 | 3318              | 602                            |
| DRB1*03:01-DQA1*05:01-DQB1*02:01 | Sjögren syndrome                | 2.32 [2.13, 2.54]    | 8.16E-79  | 64362                  | 2232              | 791                            |
| DRB1*13:01-DQA1*01:03-DQB1*06:03 | Rheumatoid arthritis            | 0.58 [0.54, 0.61]    | 4.79E-68  | 55252                  | 11036             | 1167                           |
| DRB1*04:04-DQA1*03:01-DQB1*03:02 | Type 1 diabetes                 | 2.2 [2, 2.43]        | 1.27E-55  | 27698                  | 3108              | 550                            |
| DRB1*01:01-DQA1*01:01-DQB1*05:01 | Sarcoidosis                     | 0.53 [0.48, 0.57]    | 1.03E-54  | 114609                 | 3506              | 759                            |
| DRB1*13:01-DQA1*01:03-DQB1*06:03 | Type 1 diabetes                 | 0.3 [0.26, 0.35]     | 2.90E-48  | 55252                  | 3108              | 161                            |
| DRB1*03:01-DQA1*05:01-DQB1*02:01 | Sarcoidosis                     | 1.73 [1.61, 1.86]    | 3.61E-48  | 64362                  | 3506              | 1030                           |
| DRB1*01:01-DQA1*01:01-DQB1*05:01 | Type 1 diabetes                 | 0.53 [0.49, 0.58]    | 2.18E-44  | 114609                 | 3108              | 671                            |
| DRB1*04:04-DQA1*03:01-DQB1*03:02 | Rheumatoid arthritis            | 1.53 [1.44, 1.62]    | 2.21E-44  | 27698                  | 11036             | 1310                           |
| DRB1*03:01-DQA1*05:01-DQB1*02:01 | Systemic lupus erythematosus    | 2.34 [2.04, 2.68]    | 3.99E-34  | 64362                  | 907               | 327                            |
| DRB1*15:01-DQA1*01:02-DQB1*06:02 | Rheumatoid arthritis            | 0.76 [0.72, 0.79]    | 3.72E-32  | 87730                  | 11036             | 2387                           |
| DRB1*01:01-DQA1*01:01-DQB1*05:01 | Rheumatoid arthritis            | 1.26 [1.21, 1.31]    | 3.62E-31  | 114609                 | 11036             | 4439                           |
| DRB1*13:01-DQA1*01:03-DQB1*06:03 | Coeliac disease                 | 0.5 [0.44, 0.56]     | 1.61E-30  | 55252                  | 3318              | 304                            |
| DRB1*15:01-DQA1*01:02-DQB1*06:02 | Autoimmune hypothyroidism       | 0.87 [0.84, 0.89]    | 1.26E-26  | 87730                  | 35504             | 8604                           |
| DRB1*03:01-DQA1*05:01-DQB1*02:01 | Mixed connective tissue disease | 1.77 [1.59, 1.97]    | 1.62E-25  | 64362                  | 1620              | 481                            |
| DRB1*15:01-DQA1*01:02-DQB1*06:02 | Ankylosing spondylitis          | 0.58 [0.53, 0.65]    | 6.90E-25  | 87730                  | 2546              | 445                            |
| DRB1*04:04-DQA1*03:01-DQB1*03:02 | Autoimmune hypothyroidism       | 1.21 [1.17, 1.26]    | 4.49E-23  | 27698                  | 35504             | 3434                           |
| DRB1*03:01-DQA1*05:01-DQB1*02:01 | Autoimmune hypothyroidism       | 1.13 [1.1, 1.17]     | 1.65E-18  | 64362                  | 35504             | 7405                           |
| DRB1*15:01-DQA1*01:02-DQB1*06:02 | Coeliac disease                 | 0.68 [0.63, 0.74]    | 2.19E-18  | 87730                  | 3318              | 657                            |

|                                  |                                 |                   |          |        |       |       |
|----------------------------------|---------------------------------|-------------------|----------|--------|-------|-------|
| DRB1*01:01-DQA1*01:01-DQB1*05:01 | Sjögren syndrome                | 0.66 [0.6, 0.72]  | 7.46E-18 | 114609 | 2232  | 583   |
| DRB1*15:01-DQA1*01:02-DQB1*06:02 | Sarcoidosis                     | 1.33 [1.24, 1.43] | 2.38E-15 | 87730  | 3506  | 1155  |
| DRB1*01:01-DQA1*01:01-DQB1*05:01 | Vitamin B12 deficiency anaemia  | 0.73 [0.67, 0.79] | 3.61E-14 | 114609 | 2968  | 828   |
| DRB1*01:01-DQA1*01:01-DQB1*05:01 | Multiple Sclerosis              | 0.67 [0.61, 0.75] | 5.78E-14 | 114609 | 1873  | 488   |
| DRB1*04:01-DQA1*03:01-DQB1*03:02 | Autoimmune hypothyroidism       | 1.13 [1.09, 1.16] | 6.92E-14 | 48292  | 35504 | 5497  |
| DRB1*01:01-DQA1*01:01-DQB1*05:01 | Autoimmune hypothyroidism       | 0.91 [0.89, 0.94] | 2.55E-13 | 114609 | 35504 | 11784 |
| DRB1*15:01-DQA1*01:02-DQB1*06:02 | Vitamin B12 deficiency anaemia  | 1.33 [1.23, 1.44] | 5.32E-13 | 87730  | 2968  | 971   |
| DRB1*01:01-DQA1*01:01-DQB1*05:01 | Psoriasis                       | 0.84 [0.8, 0.88]  | 8.91E-13 | 114609 | 8061  | 2491  |
| DRB1*03:01-DQA1*05:01-DQB1*02:01 | Ankylosing spondylitis          | 0.69 [0.62, 0.77] | 7.27E-11 | 64362  | 2546  | 365   |
| DRB1*03:01-DQA1*05:01-DQB1*02:01 | Adrenocortical insufficiency    | 1.61 [1.38, 1.88] | 2.51E-09 | 64362  | 789   | 219   |
| DRB1*13:01-DQA1*01:03-DQB1*06:03 | Sjögren syndrome                | 0.68 [0.6, 0.78]  | 4.63E-09 | 55252  | 2232  | 272   |
| DRB1*13:01-DQA1*01:03-DQB1*06:03 | Ankylosing spondylitis          | 0.73 [0.65, 0.82] | 7.91E-08 | 55252  | 2546  | 323   |
| DRB1*15:01-DQA1*01:02-DQB1*06:02 | Sjögren syndrome                | 1.26 [1.15, 1.38] | 4.69E-07 | 87730  | 2232  | 698   |
| DRB1*13:01-DQA1*01:03-DQB1*06:03 | Inflammatory bowel disease      | 1.14 [1.08, 1.2]  | 4.85E-07 | 55252  | 10032 | 1853  |
| DRB1*13:01-DQA1*01:03-DQB1*06:03 | Vitamin B12 deficiency anaemia  | 0.76 [0.69, 0.85] | 5.32E-07 | 55252  | 2968  | 404   |
| DRB1*04:04-DQA1*03:01-DQB1*03:02 | Ankylosing spondylitis          | 1.37 [1.21, 1.55] | 7.50E-07 | 27698  | 2546  | 279   |
| DRB1*01:01-DQA1*01:01-DQB1*05:01 | Adrenocortical insufficiency    | 0.68 [0.58, 0.79] | 1.34E-06 | 114609 | 789   | 208   |
| DRB1*03:01-DQA1*05:01-DQB1*02:01 | Rheumatoid arthritis            | 0.88 [0.84, 0.93] | 1.87E-06 | 64362  | 11036 | 1914  |
| DRB1*04:01-DQA1*03:01-DQB1*03:02 | Inflammatory bowel disease      | 0.86 [0.81, 0.92] | 1.91E-06 | 48292  | 10032 | 1277  |
| DRB1*15:01-DQA1*01:02-DQB1*06:02 | Psoriasis                       | 0.88 [0.84, 0.93] | 1.93E-06 | 87730  | 8061  | 1969  |
| DRB1*04:01-DQA1*03:01-DQB1*03:02 | Ankylosing spondylitis          | 0.74 [0.65, 0.84] | 2.46E-06 | 48292  | 2546  | 281   |
| DRB1*01:01-DQA1*01:01-DQB1*05:01 | Autoimmune hyperthyroidism      | 0.82 [0.75, 0.89] | 5.67E-06 | 114609 | 2534  | 764   |
| DRB1*13:01-DQA1*01:03-DQB1*06:03 | Systemic lupus erythematosus    | 0.62 [0.51, 0.77] | 6.91E-06 | 55252  | 907   | 102   |
| DRB1*13:01-DQA1*01:03-DQB1*06:03 | Psoriasis                       | 0.87 [0.82, 0.92] | 7.45E-06 | 55252  | 8061  | 1200  |
| DRB1*04:04-DQA1*03:01-DQB1*03:02 | Adrenocortical insufficiency    | 1.6 [1.29, 1.97]  | 1.36E-05 | 27698  | 789   | 100   |
| DRB1*13:01-DQA1*01:03-DQB1*06:03 | Wegener granulomatosis          | 0.44 [0.3, 0.64]  | 1.81E-05 | 55252  | 364   | 30    |
| DRB1*15:01-DQA1*01:02-DQB1*06:02 | Primary biliary cholangitis     | 0.61 [0.49, 0.77] | 2.59E-05 | 87730  | 497   | 91    |
| DRB1*15:01-DQA1*01:02-DQB1*06:02 | IgA nephropathy                 | 0.62 [0.5, 0.78]  | 3.27E-05 | 87730  | 513   | 95    |
| DRB1*13:01-DQA1*01:03-DQB1*06:03 | Mixed connective tissue disease | 0.74 [0.64, 0.86] | 5.73E-05 | 55252  | 1620  | 210   |

|                                  |                                 |                   |          |        |       |      |
|----------------------------------|---------------------------------|-------------------|----------|--------|-------|------|
| DRB1*04:01-DQA1*03:01-DQB1*03:02 | Alopecia areata                 | 1.5 [1.22, 1.84]  | 1.03E-04 | 48292  | 584   | 116  |
| DRB1*13:01-DQA1*01:03-DQB1*06:03 | Autoimmune hypothyroidism       | 0.94 [0.91, 0.97] | 1.39E-04 | 55252  | 35504 | 5674 |
| DRB1*15:01-DQA1*01:02-DQB1*06:02 | Systemic lupus erythematosus    | 1.3 [1.13, 1.5]   | 2.23E-04 | 87730  | 907   | 294  |
| DRB1*13:01-DQA1*01:03-DQB1*06:03 | Sarcoidosis                     | 1.17 [1.07, 1.27] | 3.53E-04 | 55252  | 3506  | 673  |
| DRB1*03:01-DQA1*05:01-DQB1*02:01 | Vitamin B12 deficiency anaemia  | 1.17 [1.07, 1.28] | 4.23E-04 | 64362  | 2968  | 652  |
| DRB1*13:01-DQA1*01:03-DQB1*06:03 | Multiple Sclerosis              | 0.79 [0.69, 0.9]  | 4.72E-04 | 55252  | 1873  | 259  |
| DRB1*04:04-DQA1*03:01-DQB1*03:02 | Inflammatory bowel disease      | 0.87 [0.81, 0.94] | 4.78E-04 | 27698  | 10032 | 746  |
| DRB1*13:01-DQA1*01:03-DQB1*06:03 | Systemic sclerosis              | 0.63 [0.48, 0.82] | 5.75E-04 | 55252  | 552   | 62   |
| DRB1*03:01-DQA1*05:01-DQB1*02:01 | Allergic purpura                | 0.71 [0.58, 0.87] | 9.56E-04 | 64362  | 747   | 110  |
| DRB1*01:01-DQA1*01:01-DQB1*05:01 | Mixed connective tissue disease | 0.84 [0.75, 0.93] | 9.97E-04 | 114609 | 1620  | 500  |
| DRB1*01:01-DQA1*01:01-DQB1*05:01 | Ankylosing spondylitis          | 1.14 [1.05, 1.24] | 1.43E-03 | 114609 | 2546  | 959  |
| DRB1*04:04-DQA1*03:01-DQB1*03:02 | Autoimmune hyperthyroidism      | 0.78 [0.66, 0.91] | 1.78E-03 | 27698  | 2534  | 165  |
| DRB1*03:01-DQA1*05:01-DQB1*02:01 | IgA nephropathy                 | 0.67 [0.53, 0.87] | 2.04E-03 | 64362  | 513   | 72   |
| DRB1*04:04-DQA1*03:01-DQB1*03:02 | Vitamin B12 deficiency anaemia  | 1.21 [1.07, 1.37] | 2.18E-03 | 27698  | 2968  | 289  |
| DRB1*04:01-DQA1*03:01-DQB1*03:02 | Sjögren syndrome                | 0.82 [0.72, 0.93] | 2.41E-03 | 48292  | 2232  | 263  |
| DRB1*03:01-DQA1*05:01-DQB1*02:01 | Wegener granulomatosis          | 0.63 [0.46, 0.85] | 2.80E-03 | 64362  | 364   | 48   |
| DRB1*01:01-DQA1*01:01-DQB1*05:01 | Allergic purpura                | 1.25 [1.08, 1.45] | 2.81E-03 | 114609 | 747   | 297  |
| DRB1*04:04-DQA1*03:01-DQB1*03:02 | Sarcoidosis                     | 0.82 [0.72, 0.93] | 2.87E-03 | 27698  | 3506  | 240  |
| DRB1*03:01-DQA1*05:01-DQB1*02:01 | Psoriasis                       | 0.92 [0.86, 0.97] | 2.89E-03 | 64362  | 8061  | 1450 |
| DRB1*15:01-DQA1*01:02-DQB1*06:02 | Wegener granulomatosis          | 1.38 [1.11, 1.71] | 4.26E-03 | 87730  | 364   | 122  |
| DRB1*01:01-DQA1*01:01-DQB1*05:01 | Systemic lupus erythematosus    | 0.81 [0.7, 0.94]  | 4.49E-03 | 114609 | 907   | 271  |
| DRB1*01:01-DQA1*01:01-DQB1*05:01 | Systemic sclerosis              | 1.28 [1.08, 1.52] | 4.56E-03 | 114609 | 552   | 227  |
| DRB1*01:01-DQA1*01:01-DQB1*05:01 | Wegener granulomatosis          | 0.72 [0.57, 0.9]  | 4.60E-03 | 114609 | 364   | 100  |
| DRB1*04:01-DQA1*03:01-DQB1*03:02 | Multiple Sclerosis              | 0.82 [0.71, 0.94] | 4.80E-03 | 48292  | 1873  | 225  |
| DRB1*04:01-DQA1*03:01-DQB1*03:02 | Wegener granulomatosis          | 1.45 [1.12, 1.89] | 5.02E-03 | 48292  | 364   | 70   |
| DRB1*03:01-DQA1*05:01-DQB1*02:01 | Myasthenia gravis               | 1.38 [1.09, 1.75] | 7.04E-03 | 64362  | 372   | 93   |
| DRB1*04:01-DQA1*03:01-DQB1*03:02 | Vitiligo                        | 1.54 [1.12, 2.11] | 8.25E-03 | 48292  | 236   | 48   |
| DRB1*15:01-DQA1*01:02-DQB1*06:02 | Systemic sclerosis              | 0.77 [0.62, 0.94] | 1.02E-02 | 87730  | 552   | 119  |
| DRB1*13:01-DQA1*01:03-DQB1*06:03 | Vitiligo                        | 1.49 [1.1, 2.02]  | 1.06E-02 | 55252  | 236   | 54   |

|                                  |                                     |                   |          |        |       |      |
|----------------------------------|-------------------------------------|-------------------|----------|--------|-------|------|
| DRB1*01:01-DQA1*01:01-DQB1*05:01 | IgA nephropathy                     | 1.25 [1.05, 1.49] | 1.37E-02 | 114609 | 513   | 205  |
| DRB1*13:01-DQA1*01:03-DQB1*06:03 | Autoimmune hyperthyroidism          | 0.87 [0.78, 0.97] | 1.39E-02 | 55252  | 2534  | 378  |
| DRB1*13:01-DQA1*01:03-DQB1*06:03 | Primary biliary cholangitis         | 0.72 [0.55, 0.94] | 1.51E-02 | 55252  | 497   | 64   |
| DRB1*01:01-DQA1*01:01-DQB1*05:01 | Guillain-Barre syndrome             | 1.3 [1.05, 1.61]  | 1.61E-02 | 114609 | 356   | 145  |
| DRB1*04:01-DQA1*03:01-DQB1*03:02 | Vitamin B12 deficiency anaemia      | 1.13 [1.02, 1.25] | 1.71E-02 | 48292  | 2968  | 467  |
| DRB1*04:04-DQA1*03:01-DQB1*03:02 | Multiple Sclerosis                  | 1.2 [1.03, 1.4]   | 1.83E-02 | 27698  | 1873  | 181  |
| DRB1*13:01-DQA1*01:03-DQB1*06:03 | Alopecia areata                     | 0.75 [0.59, 0.95] | 1.90E-02 | 55252  | 584   | 76   |
| DRB1*04:04-DQA1*03:01-DQB1*03:02 | Wegener granulomatosis              | 1.42 [1.03, 1.97] | 3.44E-02 | 27698  | 364   | 41   |
| DRB1*13:01-DQA1*01:03-DQB1*06:03 | Myasthenia gravis                   | 0.73 [0.54, 0.99] | 4.47E-02 | 55252  | 372   | 48   |
| DRB1*03:01-DQA1*05:01-DQB1*02:01 | Vitiligo                            | 0.69 [0.48, 0.99] | 4.50E-02 | 64362  | 236   | 34   |
| DRB1*03:01-DQA1*05:01-DQB1*02:01 | Multiple Sclerosis                  | 0.89 [0.79, 1]    | 4.72E-02 | 64362  | 1873  | 339  |
| DRB1*04:01-DQA1*03:01-DQB1*03:02 | Autoimmune hyperthyroidism          | 0.89 [0.79, 1]    | 4.85E-02 | 48292  | 2534  | 327  |
| DRB1*13:01-DQA1*01:03-DQB1*06:03 | IgA nephropathy                     | 0.78 [0.6, 1]     | 5.02E-02 | 55252  | 513   | 69   |
| DRB1*04:01-DQA1*03:01-DQB1*03:02 | Systemic lupus erythematosus        | 0.82 [0.67, 1.01] | 5.89E-02 | 48292  | 907   | 109  |
| DRB1*04:01-DQA1*03:01-DQB1*03:02 | Sarcoidosis                         | 0.91 [0.83, 1.01] | 6.82E-02 | 48292  | 3506  | 459  |
| DRB1*15:01-DQA1*01:02-DQB1*06:02 | Autoimmune hyperthyroidism          | 0.92 [0.84, 1.01] | 7.33E-02 | 87730  | 2534  | 637  |
| DRB1*15:01-DQA1*01:02-DQB1*06:02 | Autoimmune hemolytic anemia         | 1.28 [0.98, 1.67] | 7.55E-02 | 87730  | 245   | 78   |
| DRB1*01:01-DQA1*01:01-DQB1*05:01 | Vitiligo                            | 0.78 [0.59, 1.03] | 8.53E-02 | 114609 | 236   | 69   |
| DRB1*01:01-DQA1*01:01-DQB1*05:01 | Primary biliary cholangitis         | 1.17 [0.97, 1.4]  | 9.80E-02 | 114609 | 497   | 190  |
| DRB1*04:01-DQA1*03:01-DQB1*03:02 | IgA nephropathy                     | 1.21 [0.96, 1.53] | 1.11E-01 | 48292  | 513   | 85   |
| DRB1*03:01-DQA1*05:01-DQB1*02:01 | Autoimmune hemolytic anemia         | 1.27 [0.94, 1.7]  | 1.16E-01 | 64362  | 245   | 58   |
| DRB1*04:04-DQA1*03:01-DQB1*03:02 | Primary biliary cholangitis         | 1.26 [0.94, 1.69] | 1.23E-01 | 27698  | 497   | 50   |
| DRB1*15:01-DQA1*01:02-DQB1*06:02 | Inflammatory bowel disease          | 1.04 [0.99, 1.08] | 1.31E-01 | 87730  | 10032 | 2717 |
| DRB1*04:04-DQA1*03:01-DQB1*03:02 | Vitiligo                            | 1.36 [0.91, 2.05] | 1.36E-01 | 27698  | 236   | 26   |
| DRB1*04:01-DQA1*03:01-DQB1*03:02 | Systemic sclerosis                  | 1.19 [0.95, 1.49] | 1.38E-01 | 48292  | 552   | 88   |
| DRB1*01:01-DQA1*01:01-DQB1*05:01 | Alopecia areata                     | 0.88 [0.74, 1.05] | 1.47E-01 | 114609 | 584   | 186  |
| DRB1*15:01-DQA1*01:02-DQB1*06:02 | Vitiligo                            | 0.8 [0.59, 1.09]  | 1.65E-01 | 87730  | 236   | 53   |
| DRB1*03:01-DQA1*05:01-DQB1*02:01 | Idiopathic thrombocytopenic purpura | 1.13 [0.95, 1.35] | 1.74E-01 | 64362  | 712   | 154  |
| DRB1*04:04-DQA1*03:01-DQB1*03:02 | Sjögren syndrome                    | 0.9 [0.76, 1.05]  | 1.76E-01 | 27698  | 2232  | 167  |

|                                  |                                     |                   |          |        |       |      |
|----------------------------------|-------------------------------------|-------------------|----------|--------|-------|------|
| DRB1*15:01-DQA1*01:02-DQB1*06:02 | Adrenocortical insufficiency        | 0.9 [0.76, 1.05]  | 1.85E-01 | 87730  | 789   | 195  |
| DRB1*04:04-DQA1*03:01-DQB1*03:02 | Allergic purpura                    | 1.18 [0.92, 1.5]  | 1.87E-01 | 27698  | 747   | 73   |
| DRB1*13:01-DQA1*01:03-DQB1*06:03 | Guillain-Barre syndrome             | 0.82 [0.61, 1.11] | 1.99E-01 | 55252  | 356   | 51   |
| DRB1*04:04-DQA1*03:01-DQB1*03:02 | Mixed connective tissue disease     | 1.12 [0.94, 1.32] | 2.03E-01 | 27698  | 1620  | 148  |
| DRB1*04:04-DQA1*03:01-DQB1*03:02 | Idiopathic thrombocytopenic purpura | 0.83 [0.63, 1.11] | 2.20E-01 | 27698  | 712   | 50   |
| DRB1*13:01-DQA1*01:03-DQB1*06:03 | Adrenocortical insufficiency        | 0.89 [0.73, 1.08] | 2.29E-01 | 55252  | 789   | 120  |
| DRB1*15:01-DQA1*01:02-DQB1*06:02 | Alopecia areata                     | 1.11 [0.93, 1.33] | 2.55E-01 | 87730  | 584   | 168  |
| DRB1*04:01-DQA1*03:01-DQB1*03:02 | Mixed connective tissue disease     | 1.08 [0.94, 1.24] | 2.56E-01 | 48292  | 1620  | 245  |
| DRB1*04:04-DQA1*03:01-DQB1*03:02 | Coeliac disease                     | 0.93 [0.82, 1.06] | 2.74E-01 | 27698  | 3318  | 264  |
| DRB1*15:01-DQA1*01:02-DQB1*06:02 | Myasthenia gravis                   | 1.13 [0.9, 1.42]  | 2.87E-01 | 87730  | 372   | 107  |
| DRB1*01:01-DQA1*01:01-DQB1*05:01 | Inflammatory bowel disease          | 0.98 [0.94, 1.02] | 3.22E-01 | 114609 | 10032 | 3434 |
| DRB1*04:04-DQA1*03:01-DQB1*03:02 | Psoriasis                           | 1.04 [0.96, 1.12] | 3.40E-01 | 27698  | 8061  | 690  |
| DRB1*04:04-DQA1*03:01-DQB1*03:02 | Alopecia areata                     | 0.86 [0.63, 1.18] | 3.45E-01 | 27698  | 584   | 42   |
| DRB1*04:04-DQA1*03:01-DQB1*03:02 | Systemic lupus erythematosus        | 0.89 [0.69, 1.14] | 3.50E-01 | 27698  | 907   | 66   |
| DRB1*04:01-DQA1*03:01-DQB1*03:02 | Coeliac disease                     | 0.96 [0.87, 1.06] | 4.11E-01 | 48292  | 3318  | 469  |
| DRB1*04:01-DQA1*03:01-DQB1*03:02 | Primary biliary cholangitis         | 0.9 [0.69, 1.17]  | 4.15E-01 | 48292  | 497   | 63   |
| DRB1*13:01-DQA1*01:03-DQB1*06:03 | Autoimmune hemolytic anemia         | 0.87 [0.61, 1.23] | 4.30E-01 | 55252  | 245   | 37   |
| DRB1*03:01-DQA1*05:01-DQB1*02:01 | Inflammatory bowel disease          | 0.98 [0.93, 1.03] | 4.31E-01 | 64362  | 10032 | 1912 |
| DRB1*04:04-DQA1*03:01-DQB1*03:02 | Systemic sclerosis                  | 1.12 [0.84, 1.49] | 4.47E-01 | 27698  | 552   | 51   |
| DRB1*13:01-DQA1*01:03-DQB1*06:03 | Idiopathic thrombocytopenic purpura | 0.93 [0.76, 1.13] | 4.60E-01 | 55252  | 712   | 112  |
| DRB1*04:01-DQA1*03:01-DQB1*03:02 | Autoimmune hemolytic anemia         | 1.14 [0.81, 1.6]  | 4.63E-01 | 48292  | 245   | 39   |
| DRB1*04:01-DQA1*03:01-DQB1*03:02 | Idiopathic thrombocytopenic purpura | 1.07 [0.87, 1.31] | 5.07E-01 | 48292  | 712   | 110  |
| DRB1*03:01-DQA1*05:01-DQB1*02:01 | Alopecia areata                     | 0.93 [0.75, 1.15] | 5.11E-01 | 64362  | 584   | 107  |
| DRB1*03:01-DQA1*05:01-DQB1*02:01 | Systemic sclerosis                  | 1.07 [0.87, 1.32] | 5.22E-01 | 64362  | 552   | 110  |
| DRB1*04:04-DQA1*03:01-DQB1*03:02 | IgA nephropathy                     | 1.09 [0.81, 1.48] | 5.61E-01 | 27698  | 513   | 46   |
| DRB1*03:01-DQA1*05:01-DQB1*02:01 | Guillain-Barre syndrome             | 1.07 [0.83, 1.39] | 5.83E-01 | 64362  | 356   | 74   |
| DRB1*01:01-DQA1*01:01-DQB1*05:01 | Idiopathic thrombocytopenic purpura | 0.96 [0.82, 1.12] | 5.88E-01 | 114609 | 712   | 237  |
| DRB1*13:01-DQA1*01:03-DQB1*06:03 | Allergic purpura                    | 0.95 [0.78, 1.16] | 6.00E-01 | 55252  | 747   | 118  |
| DRB1*15:01-DQA1*01:02-DQB1*06:02 | Idiopathic thrombocytopenic purpura | 0.96 [0.81, 1.13] | 6.16E-01 | 87730  | 712   | 185  |

|                                  |                                 |                   |          |        |      |      |
|----------------------------------|---------------------------------|-------------------|----------|--------|------|------|
| DRB1*04:01-DQA1*03:01-DQB1*03:02 | Psoriasis                       | 0.99 [0.92, 1.05] | 6.52E-01 | 48292  | 8061 | 1143 |
| DRB1*15:01-DQA1*01:02-DQB1*06:02 | Guillain-Barre syndrome         | 0.95 [0.75, 1.21] | 6.72E-01 | 87730  | 356  | 91   |
| DRB1*04:01-DQA1*03:01-DQB1*03:02 | Myasthenia gravis               | 0.94 [0.7, 1.27]  | 6.86E-01 | 48292  | 372  | 49   |
| DRB1*04:01-DQA1*03:01-DQB1*03:02 | Guillain-Barre syndrome         | 1.06 [0.79, 1.42] | 7.13E-01 | 48292  | 356  | 53   |
| DRB1*15:01-DQA1*01:02-DQB1*06:02 | Mixed connective tissue disease | 0.98 [0.88, 1.09] | 7.15E-01 | 87730  | 1620 | 424  |
| DRB1*04:01-DQA1*03:01-DQB1*03:02 | Adrenocortical insufficiency    | 1.03 [0.85, 1.26] | 7.60E-01 | 48292  | 789  | 116  |
| DRB1*04:04-DQA1*03:01-DQB1*03:02 | Myasthenia gravis               | 0.95 [0.65, 1.4]  | 8.10E-01 | 27698  | 372  | 29   |
| DRB1*01:01-DQA1*01:01-DQB1*05:01 | Myasthenia gravis               | 1.02 [0.83, 1.27] | 8.33E-01 | 114609 | 372  | 132  |
| DRB1*04:04-DQA1*03:01-DQB1*03:02 | Guillain-Barre syndrome         | 1.03 [0.71, 1.5]  | 8.59E-01 | 27698  | 356  | 30   |
| DRB1*15:01-DQA1*01:02-DQB1*06:02 | Allergic purpura                | 1.01 [0.86, 1.19] | 9.34E-01 | 87730  | 747  | 197  |
| DRB1*03:01-DQA1*05:01-DQB1*02:01 | Primary biliary cholangitis     | 1.01 [0.8, 1.26]  | 9.64E-01 | 64362  | 497  | 97   |
| DRB1*04:01-DQA1*03:01-DQB1*03:02 | Allergic purpura                | 1 [0.82, 1.23]    | 9.70E-01 | 48292  | 747  | 110  |
| DRB1*04:04-DQA1*03:01-DQB1*03:02 | Autoimmune hemolytic anemia     | 1 [0.63, 1.58]    | 9.88E-01 | 27698  | 245  | 20   |
| DRB1*01:01-DQA1*01:01-DQB1*05:01 | Autoimmune hemolytic anemia     | 1 [0.77, 1.3]     | 9.92E-01 | 114609 | 245  | 84   |

228

229

### 230 3.3.2 Analyses in HLA regions – PGS analysis

#### 231 Table S3.3.2.1: Associations between HLA PGS and AIDs

232 This table includes number of AID cases (N), number of co-occurrences of the given AID among the cases (N.co), odds ratio (OR) with 95% CI, and partial  
 233 correlation ( $\rho$ ) between AIDs and HLA-PGS for the AIDs. We computed  $\rho$  to filter the AIDs ( $|\rho|>2\%$ ) that would be used for analysis of association between HLA  
 234 PGS and T1D.  
 235

| Disease                        | Number of cases |       | HLA polygenic risk - <i>AID ~ PRSAID</i> |           |            | HLA polygenic risk - <i>T1D ~ PRSAID</i> |           |            |
|--------------------------------|-----------------|-------|------------------------------------------|-----------|------------|------------------------------------------|-----------|------------|
|                                | N               | N.co  | OR [95% CI]                              | P-value   | $\rho$ (%) | OR [95% CI]                              | P-value   | $\rho$ (%) |
| Type 1 diabetes                | 1,182           | 1 182 | 5.33 [4.79, 5.93]                        | 3.74E-207 | 29.98      | 5.33 [4.79, 5.93]                        | 3.74E-207 | 29.98      |
| Autoimmune hypothyroidism      | 2,580           | 179   | 1.23 [1.18, 1.28]                        | 1.90E-22  | 6.39       | 1.55 [1.44, 1.67]                        | 6.43E-31  | 9.66       |
| Coeliac disease                | 292             | 62    | 2.79 [2.55, 3.06]                        | 1.28E-107 | 17.07      | 2.07 [1.94, 2.22]                        | 2.39E-96  | 17.06      |
| Rheumatoid arthritis           | 712             | 29    | 1.63 [1.52, 1.76]                        | 7.14E-41  | 8.92       | 2.10 [1.95, 2.27]                        | 1.79E-78  | 15.06      |
| Vitamin B12 deficiency anaemia | 195             | 5     | 1.18 [1.02, 1.36]                        | 2.81E-02  | 1.49       |                                          |           |            |



|                                     |     |    |                   |          |       |                   |           |       |
|-------------------------------------|-----|----|-------------------|----------|-------|-------------------|-----------|-------|
| Sarcoidosis                         | 273 | 8  | 1.47 [1.29, 1.66] | 1.64E-09 | 3.97  | 1.15 [1.07, 1.24] | 2.16E-04  | 2.39  |
| Autoimmune hyperthyroidism          | 161 | 14 | 1.61 [1.41, 1.85] | 1.99E-12 | 4.68  | 1.19 [1.11, 1.27] | 7.18E-07  | 3.49  |
| Mixed connective tissue disease     | 102 | <5 | 1.17 [0.97, 1.41] | 1.04E-01 | 1.05  |                   |           |       |
| Sjögren syndrome                    | 154 | <5 | 1.39 [1.20, 1.60] | 9.30E-06 | 2.93  | 1.29 [1.21, 1.39] | 3.15E-13  | 5.21  |
| Vitiligo                            | 15  | <5 | 2.21 [1.32, 3.68] | 2.39E-03 | 2.04  | 1.83 [1.69, 1.97] | 3.39E-53  | 17.43 |
| Primary biliary cholangitis         | 38  | <5 | 1.71 [1.29, 2.28] | 2.11E-04 | 2.43  | 1.43 [1.33, 1.54] | 4.39E-21  | 7.06  |
| Autoimmune hemolytic anemia         | 17  | 0  | 0.97 [0.6, 1.55]  | 8.85E-01 | -0.11 |                   |           |       |
| Myasthenia gravis                   | 19  | 0  | 1.06 [0.68, 1.66] | 7.82E-01 | 0.17  |                   |           |       |
| Adrenocortical insufficiency        | 67  | 6  | 1.59 [1.27, 1.99] | 5.07E-05 | 2.67  | 2.30 [2.13, 2.49] | 4.17E-100 | 17.43 |
| Psoriasis                           | 547 | 22 | 1.51 [1.40, 1.62] | 6.93E-30 | 7.60  | 1.11 [1.04, 1.20] | 3.57E-03  | 2.40  |
| Systemic lupus erythematosus        | 53  | <5 | 1.77 [1.39, 2.25] | 4.40E-06 | 3.00  | 1.40 [1.31, 1.51] | 6.24E-21  | 6.44  |
| IgA nephropathy                     | 24  | 0  | 1.06 [0.71, 1.57] | 7.83E-01 | 0.17  |                   |           |       |
| Systemic sclerosis                  | 41  | 0  | 1.07 [0.79, 1.45] | 6.44E-01 | 0.32  |                   |           |       |
| Alopecia areata                     | 47  | 6  | 1.33 [1.00, 1.77] | 5.07E-02 | 1.29  |                   |           |       |
| Guillain-Barre syndrome             | 33  | <5 | 1.09 [0.78, 1.53] | 6.02E-01 | 0.34  |                   |           |       |
| Allergic purpura                    | 53  | 6  | 1.20 [0.92, 1.56] | 1.86E-01 | 0.87  |                   |           |       |
| Inflammatory bowel disease          | 670 | 18 | 1.29 [1.19, 1.39] | 2.04E-10 | 4.19  | 0.64 [0.60, 0.69] | 1.15E-30  | -9.10 |
| Wegener granulomatosis              | 23  | 0  | 1.37 [0.90, 2.11] | 1.45E-01 | 0.99  |                   |           |       |
| Ankylosing spondylitis              | 187 | <5 | 2.22 [2.03, 2.42] | 5.92E-72 | 14.08 | 0.93 [0.86, 1.00] | 6.13E-02  | -1.79 |
| Idiopathic thrombocytopenic purpura | 46  | <5 | 1.11 [0.84, 1.46] | 4.77E-01 | 0.46  |                   |           |       |
| Multiple Sclerosis                  | 128 | 8  | 1.95 [1.67, 2.29] | 1.11E-16 | 5.52  | 0.81 [0.75, 0.88] | 2.40E-07  | -4.16 |

236  
237  
238  
239  
240  
241  
242  
243

### Table S3.3.2.2: Associations between HLA PGS and AIDs using leave-one-group-out method

To fully utilize the data, we conducted a sensitivity analysis using LOGO method (Figure S2.4.2) to conduct HLA PGS analysis. The results (Table S3.3.2.2) are very similar to those from the core analysis (Table S3.3.2.1).

| Disease                             | Number of cases |       | HLA polygenic risk - <i>AID</i> ~ <i>PRS<sub>AID</sub></i> |           |            | HLA polygenic risk - <i>T1D</i> ~ <i>PRS<sub>AID</sub></i> |          |            |
|-------------------------------------|-----------------|-------|------------------------------------------------------------|-----------|------------|------------------------------------------------------------|----------|------------|
|                                     | N               | N.co  | OR (95% CI)                                                | P-value   | $\rho$ (%) | OR (95% CI)                                                | P-value  | $\rho$ (%) |
| Type 1 diabetes                     | 3 307           | 3 307 | 3.99 [3.84, 4.16]                                          | 5.27E-94  | 13.61      | 3.99 [3.84, 4.16]                                          | 5.27E-94 | 13.61      |
| Autoimmune hypothyroidism           | 41 367          | 553   | 1.25 [1.23, 1.27]                                          | 3.22E-26  | 6.74       | 1.63 [1.58, 1.69]                                          | 6.81E-16 | 4.95       |
| Coeliac disease                     | 3 792           | 159   | 2.72 [2.66, 2.79]                                          | 9.47E-127 | 15.78      | 1.81 [1.75, 1.87]                                          | 8.85E-22 | 7.89       |
| Rheumatoid arthritis                | 12 230          | 82    | 1.64 [1.61, 1.67]                                          | 6.65E-58  | 9.17       | 1.91 [1.85, 1.98]                                          | 7.21E-28 | 6.92       |
| Vitamin B12 deficiency anaemia      | 3132            | 30    | 1.31 [1.23, 1.39]                                          | 4.40E-03  | 2.28       | 1.57 [1.51, 1.63]                                          | 3.96E-10 | 3.84       |
| Sarcoidosis                         | 4117            | 34    | 1.55 [1.5, 1.6]                                            | 6.75E-14  | 4.33       | 1.11 [1.07, 1.16]                                          | 1.79E-01 | 0.95       |
| Autoimmune hyperthyroidism          | 3 054           | 48    | 1.51 [1.46, 1.55]                                          | 1.30E-14  | 4.33       | 1.27 [1.22, 1.33]                                          | 8.27E-04 | 2.63       |
| Mixed connective tissue disease     | 1898            | 13    | 1.31 [1.26, 1.37]                                          | 1.12E-03  | 2.09       | 1.65 [1.59, 1.72]                                          | 3.85E-20 | 5.73       |
| Sjögren syndrome                    | 2479            | 7     | 1.52 [1.47, 1.59]                                          | 6.16E-10  | 3.91       | 1.22 [1.16, 1.28]                                          | 4.79E-02 | 2.09       |
| Vitiligo                            | 305             | 6     | 1.54 [1.38, 1.72]                                          | 4.75E-02  | 1.28       |                                                            |          |            |
| Primary biliary cholangitis         | 574             | <5    | 1.62 [1.47, 1.78]                                          | 7.21E-03  | 2.00       | 1.38 [1.31, 1.44]                                          | 3.32E-06 | 3.18       |
| Autoimmune hemolytic anemia         | 280             | <5    | 1.23 [1.09, 1.39]                                          | 4.37E-01  | 0.53       |                                                            |          |            |
| Myasthenia gravis                   | 428             | 0     | 1.16 [1.06, 1.33]                                          | 4.25E-01  | 0.51       |                                                            |          |            |
| Adrenocortical insufficiency        | 947             | 20    | 1.25 [1.15, 1.36]                                          | 1.50E-01  | 1.13       |                                                            |          |            |
| Psoriasis                           | 9 900           | 67    | 1.49 [1.46, 1.51]                                          | 7.30E-41  | 7.51       | 1.1 [1.06, 1.14]                                           | 1.47E-01 | 0.94       |
| Systemic lupus erythematosus        | 1040            | 6     | 1.44 [1.35, 1.53]                                          | 3.80E-03  | 2.12       | 1.33 [1.27, 1.39]                                          | 7.14E-04 | 2.92       |
| IgA nephropathy                     | 647             | <5    | 1.32 [1.21, 1.43]                                          | 1.23E-01  | 1.12       |                                                            |          |            |
| Systemic sclerosis                  | 641             | <5    | 1.58 [1.45, 1.72]                                          | 1.90E-02  | 1.81       |                                                            |          |            |
| Alopecia areata                     | 755             | 15    | 1.33 [1.23, 1.45]                                          | 8.01E-02  | 1.26       |                                                            |          |            |
| Guillain-Barre syndrome             | 418             | <5    | 1.08 [0.98, 1.19]                                          | 5.15E-01  | 0.25       |                                                            |          |            |
| Allergic purpura                    | 893             | 10    | 1.24 [1.14, 1.36]                                          | 2.36E-01  | 1.05       |                                                            |          |            |
| Inflammatory bowel disease          | 12210           | 69    | 1.18 [1.16, 1.2]                                           | 4.48E-06  | 2.90       | 0.66 [0.63, 0.68]                                          | 1.82E-11 | -4.08      |
| Wegener granulomatosis              | 418             | 0     | 1.93 [1.67, 2.24]                                          | 1.83E-02  | 1.86       |                                                            |          |            |
| Ankylosing spondylitis              | 3062            | 18    | 2.34 [2.29, 2.39]                                          | 5.43E-117 | 15.22      | 0.98 [0.94, 1.01]                                          | 4.83E-01 | -0.27      |
| Idiopathic thrombocytopenic purpura | 795             | 6     | 1.06 [0.97, 1.15]                                          | 4.06E-01  | 0.24       |                                                            |          |            |
| Multiple Sclerosis                  | 2396            | 18    | 1.81 [1.74, 1.88]                                          | 5.74E-21  | 5.16       | 0.78 [0.75, 0.82]                                          | 3.32E-03 | -2.16      |

245 **3.3.3 Analyses in non-HLA regions – LDSC**

246 **Table S3.3.3.1: Genetic correlations between T1D and other 25 AIDs**

| Disease                             | $r_g$ (95% CI)      | P-value  |
|-------------------------------------|---------------------|----------|
| Autoimmune hypothyroidism           | 0.60 [0.49, 0.71]   | 5.95E-29 |
| Coeliac disease                     | 0.27 [0.13, 0.42]   | 2.00E-04 |
| Rheumatoid arthritis                | 0.46 [0.19, 0.72]   | 6.58E-04 |
| Vitamin B12 deficiency anaemia      | 0.64 [0.50, 0.79]   | 8.26E-19 |
| Sarcoidosis                         | 0.31 [0.16, 0.45]   | 3.61E-05 |
| Autoimmune hyperthyroidism          | 0.48 [0.25, 0.70]   | 3.25E-05 |
| Mixed connective tissue disease     | 0.38 [0.10, 0.65]   | 7.40E-03 |
| Sjögren syndrome                    | 0.39 [0.22, 0.55]   | 5.11E-06 |
| Vitiligo                            | 0.54 [0.05, 1.02]   | 2.92E-02 |
| Primary biliary cholangitis         | 0.46 [0.31, 0.61]   | 1.15E-09 |
| Autoimmune hemolytic anemia         | 0.53 [-0.80, 1.00]  | 4.33E-01 |
| Myasthenia gravis                   | 0.34 [0.10, 0.58]   | 5.54E-03 |
| Adrenocortical insufficiency        | 0.31 [-0.01, 0.63]  | 5.50E-02 |
| Psoriasis                           | 0.10 [0.00, 0.20]   | 4.96E-02 |
| Systemic lupus erythematosus        | 0.34 [0.16, 0.52]   | 2.63E-04 |
| IgA nephropathy                     | 0.12 [-0.1, 0.35]   | 2.86E-01 |
| Systemic sclerosis                  | 0.35 [-0.05, 0.75]  | 8.55E-02 |
| Alopecia areata                     | 0.53 [0.18, 0.88]   | 3.28E-03 |
| Guillain-Barre syndrome             | 0.14 [-0.12, 0.40]  | 2.99E-01 |
| Allergic purpura                    | 0.23 [-0.17, 0.64]  | 2.54E-01 |
| Inflammatory bowel disease          | -0.01 [-0.04, 0.02] | 4.28E-01 |
| Wegener granulomatosis              | 0.49 [-0.26, 1.00]  | 2.03E-01 |
| Ankylosing spondylitis              | 0.11 [-0.04, 0.25]  | 1.51E-01 |
| Idiopathic thrombocytopenic purpura | 0.17 [-0.18, 0.51]  | 3.37E-01 |
| Multiple Sclerosis                  | 0.17 [-0.12, 0.46]  | 2.57E-01 |

247

248

249 **Table S3.3.3.2: Sensitivity analysis of genetic correlations between T1D and other AIDs**  
 250 **significantly correlated with T1D**

| Trait 1         | Trait 2                        | Include chromosome 6 |        | Exclude chromosome 6 |        |
|-----------------|--------------------------------|----------------------|--------|----------------------|--------|
|                 |                                | Rg                   | p      | Rg                   | p      |
| Type 1 diabetes | Rheumatoid arthritis           | 0.46                 | 0.0010 | 0.47                 | 0.0000 |
| Type 1 diabetes | Autoimmune hyperthyroidism     | 0.48                 | 0.0000 | 0.47                 | 0.0000 |
| Type 1 diabetes | Autoimmune hypothyroidism      | 0.60                 | 0.0000 | 0.60                 | 0.0000 |
| Type 1 diabetes | Coeliac disease                | 0.27                 | 0.0002 | 0.25                 | 0.0005 |
| Type 1 diabetes | Vitamin B12 deficiency anaemia | 0.64                 | 0.0000 | 0.62                 | 0.0000 |
| Type 1 diabetes | Sjögren's syndrome             | 0.39                 | 0.0000 | 0.40                 | 0.0000 |

251

252 **3.4 Inter-generation cross-trait transmission**

253 **Table S3.4.1: Associations between non-HLA PGS and AIDs at population level**

| Disease                        | non-HLA polygenic risk - $AID \sim PRS_{AID}$ |            |            |
|--------------------------------|-----------------------------------------------|------------|------------|
|                                | OR (95% CI)                                   | P-value    | $\rho$ (%) |
| Type 1 diabetes                | 2.29 [2.22, 2.37]                             | 1.00E-519  | 7.93       |
| Autoimmune hypothyroidism      | 1.73 [1.71, 1.75]                             | 1.00E-2397 | 16.00      |
| Autoimmune hyperthyroidism     | 1.25 [1.21, 1.3]                              | 7.89E-39   | 1.95       |
| Vitamin B12 deficiency anaemia | 1.24 [1.2, 1.29]                              | 4.15E-40   | 1.97       |
| Sarcoidosis                    | 1.27 [1.23, 1.3]                              | 4.59E-59   | 2.43       |
| Primary biliary cholangitis    | 1.27 [1.18, 1.37]                             | 5.15E-10   | 0.93       |
| Coeliac disease                | 1.66 [1.61, 1.72]                             | 9.73E-184  | 4.34       |
| Inflammatory bowel disease     | 1.58 [1.55, 1.6]                              | 1.00E-582  | 7.78       |
| IgA nephropathy                | 1.07 [1, 1.15]                                | 6.03E-02   | 0.28       |
| Ankylosing spondylitis         | 1.58 [1.52, 1.64]                             | 2.76E-120  | 3.48       |
| Rheumatoid arthritis           | 1.46 [1.43, 1.48]                             | 1.00E-426  | 6.64       |
| Sjögren syndrome               | 1.18 [1.14, 1.23]                             | 1.18E-19   | 1.36       |
| Systemic sclerosis             | 1.17 [1.07, 1.28]                             | 5.30E-06   | 0.70       |
| Systemic lupus erythematosus   | 1.76 [1.66, 1.86]                             | 1.42E-83   | 2.91       |
| Multiple Sclerosis             | 1.79 [1.72, 1.86]                             | 1.91E-190  | 4.42       |
| Myasthenia gravis              | 1.23 [1.13, 1.35]                             | 5.24E-06   | 0.68       |
| Alopecia areata                | 1.05 [0.99, 1.13]                             | 1.19E-01   | 0.23       |
| Psoriasis                      | 1.5 [1.48, 1.53]                              | 1.00E-398  | 6.41       |
| Vitiligo                       | 1.54 [1.39, 1.72]                             | 5.82E-15   | 1.17       |

254

255 **Table S3.4.2 Polygenic transmission disequilibrium tests by HLA and non-HLA in trios**

| Disease                   | Region  | Group status | Count | Mean (95% CI)       | P-value   |
|---------------------------|---------|--------------|-------|---------------------|-----------|
| Type 1 diabetes           | HLA     | Affected     | 779   | 1.23 [1.16, 1.3]    | 2.61E-163 |
| Type 1 diabetes           | HLA     | Unaffected   | 1321  | -0.06 [-0.13, 0.01] | 8.19E-02  |
| Type 1 diabetes           | non-HLA | Affected     | 779   | 0.69 [0.62, 0.75]   | 9.59E-74  |
| Type 1 diabetes           | non-HLA | Unaffected   | 1321  | 0 [-0.06, 0.05]     | 8.79E-01  |
| Autoimmune hypothyroidism | HLA     | Affected     | 565   | 0.4 [0.31, 0.49]    | 5.74E-18  |
| Autoimmune hypothyroidism | HLA     | Unaffected   | 935   | 0 [-0.07, 0.07]     | 9.62E-01  |
| Autoimmune hypothyroidism | non-HLA | Affected     | 565   | 0.28 [0.2, 0.36]    | 8.02E-11  |
| Autoimmune hypothyroidism | non-HLA | Unaffected   | 935   | -0.04 [-0.11, 0.03] | 2.26E-01  |
| Coeliac disease           | HLA     | Affected     | 768   | 0.67 [0.59, 0.74]   | 1.74E-62  |
| Coeliac disease           | HLA     | Unaffected   | 1269  | -0.02 [-0.08, 0.05] | 5.87E-01  |
| Coeliac disease           | non-HLA | Affected     | 768   | 0.04 [-0.02, 0.1]   | 2.23E-01  |
| Coeliac disease           | non-HLA | Unaffected   | 1269  | 0.01 [-0.04, 0.05]  | 4.42E-01  |

|                                 |         |            |      |                      |          |
|---------------------------------|---------|------------|------|----------------------|----------|
| Rheumatoid arthritis            | HLA     | Affected   | 728  | 0.53 [0.46, 0.6]     | 7.35E-43 |
| Rheumatoid arthritis            | HLA     | Unaffected | 1234 | -0.01 [-0.07, 0.06]  | 8.44E-01 |
| Rheumatoid arthritis            | non-HLA | Affected   | 728  | 0.21 [0.14, 0.28]    | 5.16E-09 |
| Rheumatoid arthritis            | non-HLA | Unaffected | 1234 | -0.08 [-0.14, -0.02] | 6.00E-03 |
| Systemic lupus erythematosus    | HLA     | Affected   | 797  | 0.27 [0.21, 0.34]    | 3.08E-15 |
| Systemic lupus erythematosus    | HLA     | Unaffected | 1347 | 0.01 [-0.04, 0.07]   | 6.54E-01 |
| Systemic lupus erythematosus    | non-HLA | Affected   | 797  | 0.13 [0.06, 0.19]    | 1.58E-04 |
| Systemic lupus erythematosus    | non-HLA | Unaffected | 1347 | -0.02 [-0.07, 0.02]  | 3.24E-01 |
| Sarcoidosis                     | HLA     | Affected   | 781  | 0.12 [0.06, 0.19]    | 3.23E-04 |
| Sarcoidosis                     | HLA     | Unaffected | 1322 | -0.01 [-0.06, 0.04]  | 7.12E-01 |
| Sarcoidosis                     | non-HLA | Affected   | 781  | 0.11 [0.04, 0.18]    | 1.41E-03 |
| Sarcoidosis                     | non-HLA | Unaffected | 1322 | 0 [-0.05, 0.05]      | 9.59E-01 |
| Psoriasis                       | HLA     | Affected   | 751  | 0.13 [0.06, 0.2]     | 3.91E-04 |
| Psoriasis                       | HLA     | Unaffected | 1256 | -0.01 [-0.07, 0.04]  | 6.54E-01 |
| Psoriasis                       | non-HLA | Affected   | 751  | -0.01 [-0.07, 0.06]  | 7.96E-01 |
| Psoriasis                       | non-HLA | Unaffected | 1256 | 0.03 [-0.02, 0.08]   | 2.35E-01 |
| Inflammatory bowel disease      | HLA     | Affected   | 756  | -0.38 [-0.45, -0.31] | 3.07E-22 |
| Inflammatory bowel disease      | HLA     | Unaffected | 1284 | -0.04 [-0.1, 0.02]   | 1.74E-01 |
| Inflammatory bowel disease      | non-HLA | Affected   | 756  | -0.01 [-0.08, 0.06]  | 8.05E-01 |
| Inflammatory bowel disease      | non-HLA | Unaffected | 1284 | -0.01 [-0.07, 0.04]  | 6.55E-01 |
| Multiple Sclerosis              | HLA     | Affected   | 793  | -0.15 [-0.23, -0.08] | 3.45E-05 |
| Multiple Sclerosis              | HLA     | Unaffected | 1341 | 0.07 [0.02, 0.13]    | 1.10E-02 |
| Multiple Sclerosis              | non-HLA | Affected   | 793  | 0.05 [-0.02, 0.12]   | 1.99E-01 |
| Multiple Sclerosis              | non-HLA | Unaffected | 1341 | -0.02 [-0.07, 0.04]  | 5.97E-01 |
| Ankylosing spondylitis          | HLA     | Affected   | 793  | -0.11 [-0.18, -0.04] | 1.27E-03 |
| Ankylosing spondylitis          | HLA     | Unaffected | 1337 | -0.02 [-0.08, 0.03]  | 4.04E-01 |
| Ankylosing spondylitis          | non-HLA | Affected   | 793  | -0.09 [-0.16, -0.02] | 1.38E-02 |
| Ankylosing spondylitis          | non-HLA | Unaffected | 1337 | -0.01 [-0.07, 0.05]  | 7.23E-01 |
| Vitamin B12 deficiency anaemia  | HLA     | Affected   | 778  | 0.39 [0.32, 0.45]    | 2.65E-27 |
| Vitamin B12 deficiency anaemia  | HLA     | Unaffected | 1320 | 0.02 [-0.04, 0.07]   | 5.42E-01 |
| Autoimmune hyperthyroidism      | HLA     | Affected   | 783  | 0.14 [0.06, 0.21]    | 2.14E-04 |
| Autoimmune hyperthyroidism      | HLA     | Unaffected | 1327 | 0.01 [-0.05, 0.07]   | 6.97E-01 |
| Primary biliary cholangitis     | HLA     | Affected   | 796  | 0.3 [0.23, 0.37]     | 1.87E-16 |
| Primary biliary cholangitis     | HLA     | Unaffected | 1346 | 0 [-0.05, 0.06]      | 9.18E-01 |
| Mixed connective tissue disease | HLA     | Affected   | 790  | 0.47 [0.41, 0.54]    | 1.39E-38 |
| Mixed connective tissue disease | HLA     | Unaffected | 1331 | 0.01 [-0.05, 0.07]   | 8.05E-01 |
| Sjögren syndrome                | HLA     | Affected   | 786  | 0.21 [0.14, 0.27]    | 1.46E-09 |
| Sjögren syndrome                | HLA     | Unaffected | 1322 | 0.03 [-0.02, 0.09]   | 2.72E-01 |
| Adrenocortical insufficiency    | HLA     | Affected   | 795  | 0.62 [0.55, 0.68]    | 9.11E-61 |
| Adrenocortical insufficiency    | HLA     | Unaffected | 1345 | -0.01 [-0.06, 0.04]  | 6.73E-01 |

256  
257  
258

Patterns were observed from **Table S3.4.1** as below.

### Pattern 1: HLA + non-HLA

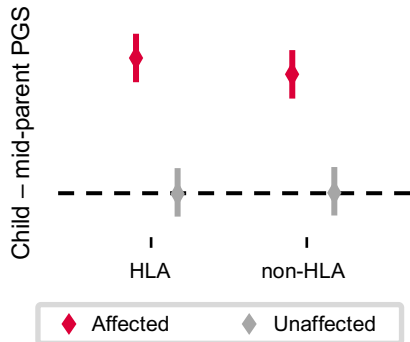

### Pattern 2: Only HLA

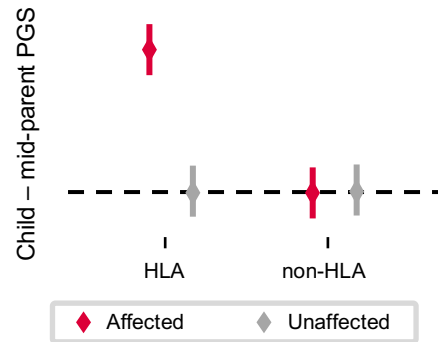

259  
260  
261  
262  
263

### 3.5 Distribution ratio between HLA PGS and non-HLA PGS

264 After observing these two different patterns from pTDT, we then wonder if we can quantify the contribution  
265 ratio between HLA PGS and non-HLA PGS for cross-disease transmission by considering genetic  
266 architecture of target disease. We took the ten AIDs with both HLA PGS and non-HLA PGS in pTDT into  
267 account and removed psoriasis and sarcoidosis when we used the ten AID to predict T1D at individual level  
268 and set  $|\rho| > 1\%$  (**Table S3.5.1**). For the rest seven AIDs (T1D is not applicable), we found that we could use  
269 our equation to quantify the contribution ratio between HLA PGS and non-HLA PGS using  $\rho_{\text{HLA PGS}}$  and  
270  $\rho_{\text{non-HLA PGS}}$  while considering the results from pTDT (**Table S3.5.2**). For instance, for RA from the first  
271 group, the ratio trained from real data is 0.71:0.29 and that from our equation is 0.76:0.24. For IBD from  
272 the group that non-HLA PGS is not transmitted, the ratios are 0.96:0.04 and 1.00:0.00. The results show  
273 that the ratios from Ratio 3 calculated from our equation are very close to the observed ratios from Ratio 2  
274 (Pearson correlation  $r=0.977$ ). Our equation could provide a reliable ratio between HLA PGS and non-HLA  
275 PGS in the setting of cross-disease transmission.

276

277 **Table S3.5.1 Associations between PGSs for AIDs and T1D in population**

| Disease                      | HLA regions       |           |            | non-HLA regions   |           |            |
|------------------------------|-------------------|-----------|------------|-------------------|-----------|------------|
|                              | OR (95% CI)       | P-value   | $\rho$ (%) | OR (95% CI)       | P-value   | $\rho$ (%) |
| Type 1 diabetes              | 3.68 [3.54, 3.83] | 1.00E-959 | 12.54      | 1.84 [1.78, 1.91] | 1.12E-257 | 6.30       |
| Autoimmune hypothyroidism    | 1.55 [1.5, 1.6]   | 2.86E-153 | 4.22       | 1.45 [1.4, 1.49]  | 2.33E-104 | 3.40       |
| Coeliac disease              | 1.8 [1.75, 1.85]  | 1.00E-421 | 7.61       | 1.1 [1.05, 1.14]  | 5.11E-06  | 0.83       |
| Rheumatoid arthritis         | 1.89 [1.84, 1.95] | 1.00E-346 | 6.54       | 1.33 [1.29, 1.38] | 2.04E-63  | 2.66       |
| Systemic lupus erythematosus | 1.3 [1.26, 1.34]  | 1.02E-60  | 2.62       | 1.12 [1.08, 1.16] | 5.02E-11  | 1.10       |
| Sarcoidosis                  | 1.12 [1.08, 1.16] | 2.58E-11  | 0.97       | 1.09 [1.05, 1.13] | 3.60E-07  | 0.83       |
| Psoriasis                    | 1.11 [1.08, 1.15] | 8.15E-11  | 1.05       | 1.01 [0.97, 1.04] | 7.05E-01  | 0.01       |
| Inflammatory bowel disease   | 0.65 [0.63, 0.67] | 4.53E-143 | -4.07      | 1.02 [0.98, 1.05] | 3.59E-01  | -0.13      |
| Multiple Sclerosis           | 0.82 [0.79, 0.84] | 8.18E-30  | -1.77      | 1.02 [0.99, 1.06] | 2.33E-01  | 0.14       |
| Ankylosing spondylitis       | 0.97 [0.93, 1]    | 6.00E-02  | -0.31      | 0.94 [0.91, 0.97] | 8.43E-05  | -0.69      |

278  
279  
280

**Table S3.5.2 Contribution ratio between HLA PGS and non-HLA PGS**

281 We reported Pearson correlation (r) and three ratios between HLA PGS and non-HLA PGS. Ratio 1 is the ratio between  
282  $\rho_{\text{HLA PGS}}$  and  $\rho_{\text{non-HLA PGS}}$  when we predicted AID using PGSs for that AID. Ratio 2 is from T1D prediction using the  
283 same PGSs. Ratio 3 is from our equation for T1D prediction (**Methods**).

|                              | r     | Ratio 1 |         | Ratio 2 |         | Ratio 3 |         |
|------------------------------|-------|---------|---------|---------|---------|---------|---------|
|                              |       | HLA     | non-HLA | HLA     | non-HLA | HLA     | non-HLA |
| Type 1 diabetes              | 0.128 | 0.67    | 0.33    | N/A     | N/A     | N/A     | N/A     |
| Autoimmune hypothyroidism    | 0.017 | 0.31    | 0.69    | 0.55    | 0.45    | 0.48    | 0.52    |
| Rheumatoid arthritis         | 0.079 | 0.61    | 0.39    | 0.71    | 0.29    | 0.76    | 0.24    |
| Systemic lupus erythematosus | 0.104 | 0.48    | 0.52    | 0.70    | 0.30    | 0.65    | 0.35    |
| Coeliac disease              | 0.016 | 0.79    | 0.21    | 0.90    | 0.10    | 1.00    | 0.00    |
| Psoriasis                    | 0.038 | 0.55    | 0.45    | 0.99    | 0.01    | 1.00    | 0.00    |
| Inflammatory bowel disease   | 0.005 | 0.29    | 0.71    | 0.96    | 0.04    | 1.00    | 0.00    |
| Multiple Sclerosis           | 0.042 | 0.57    | 0.43    | 0.93    | 0.07    | 1.00    | 0.00    |

284  
285

286 **3.6 Predicting risk of T1D in offspring using parental PGS**

287 We tried five different AID PGSs to predict T1D at an individual level. Using trio data, we compared these five PGSs  
 288 to clinical diagnoses from parents for T1D prediction in offspring. For each analysis, we reported their AUC and the  
 289 differences between PRS-CS and Full-PGS using P-value from t-test (P).

290 **Table S3.6.1 Comparisons among models using PRS-CS, Full-PGS using ratio 1, and HLA**  
 291 **PGS along with non-HLA PGS at individual level for predicting the same AID**

| AUC comparisons |                              | PRS-CS | Full-PGS | P        | HLA + non-HLA | HLA   | non-HLA |
|-----------------|------------------------------|--------|----------|----------|---------------|-------|---------|
| Pattern 1       | Type 1 diabetes              | 0.804  | 0.906    | 3.02E-07 | 0.905         | 0.882 | 0.754   |
|                 | Autoimmune hypothyroidism    | 0.659  | 0.668    | 3.39E-01 | 0.668         | 0.568 | 0.655   |
|                 | Rheumatoid arthritis         | 0.615  | 0.672    | 1.74E-02 | 0.672         | 0.654 | 0.605   |
|                 | Systemic lupus erythematosus | 0.627  | 0.657    | 5.50E-01 | 0.656         | 0.628 | 0.641   |
| Pattern 2       | Coeliac disease              | 0.579  | 0.837    | 4.40E-06 | 0.834         | 0.829 | 0.617   |
|                 | Psoriasis                    | 0.604  | 0.662    | 2.19E-01 | 0.659         | 0.628 | 0.607   |
|                 | Inflammatory bowel disease   | 0.614  | 0.632    | 4.47E-01 | 0.646         | 0.605 | 0.599   |
|                 | Multiple Sclerosis           | 0.597  | 0.722    | 1.11E-01 | 0.720         | 0.681 | 0.635   |

292  
 293  
 294 **Table S3.6.2 Comparisons among models using PRS-CS, Full-PGS using ratio 3, and HLA**  
 295 **PGS along with non-HLA PGS at individual level for T1D prediction**  
 296

| AUC comparisons |                              | PRS-CS | Full-PGS | P        | HLA + non-HLA | HLA   | non-HLA |
|-----------------|------------------------------|--------|----------|----------|---------------|-------|---------|
| Pattern 1       | Type 1 diabetes              | 0.804  | 0.906    | 3.02E-07 | 0.905         | 0.882 | 0.754   |
|                 | Autoimmune hypothyroidism    | 0.630  | 0.668    | 5.29E-06 | 0.671         | 0.637 | 0.605   |
|                 | Rheumatoid arthritis         | 0.653  | 0.738    | 8.39E-04 | 0.738         | 0.730 | 0.592   |
|                 | Systemic lupus erythematosus | 0.592  | 0.595    | 6.17E-01 | 0.593         | 0.578 | 0.551   |
| Pattern 2       | Coeliac disease              | 0.535  | 0.745    | 5.38E-08 | 0.745         | 0.745 | 0.513   |
|                 | Psoriasis                    | 0.511  | 0.553    | 6.21E-03 | 0.553         | 0.553 | 0.503   |
|                 | Inflammatory bowel disease   | 0.545  | 0.639    | 6.85E-05 | 0.639         | 0.639 | 0.505   |
|                 | Multiple Sclerosis           | 0.529  | 0.554    | 1.01E-01 | 0.554         | 0.554 | 0.503   |

297  
 298  
 299



300 **Table S3.6.3 AUC comparisons among models using parental diagnosis, parental full PGS**  
 301 **using PRS-CS, Full-PGS, and parental HLA PGS along with parental non-HLA PGS in**  
 302 **12,563 genotyped trios for T1D prediction**  
 303

| AUC comparisons |                              | Diagnosis | PRS-CS | Full-PGS | P        | HLA + non-HLA | HLA   | non-HLA |
|-----------------|------------------------------|-----------|--------|----------|----------|---------------|-------|---------|
| Pattern 1       | Type 1 diabetes              | 0.509     | 0.733  | 0.817    | 5.63E-05 | 0.818         | 0.793 | 0.684   |
|                 | Autoimmune hypothyroidism    | 0.522     | 0.590  | 0.613    | 6.31E-04 | 0.614         | 0.589 | 0.573   |
|                 | Rheumatoid arthritis         | 0.509     | 0.615  | 0.682    | 6.51E-03 | 0.682         | 0.674 | 0.572   |
|                 | Systemic lupus erythematosus | 0.501     | 0.574  | 0.568    | 7.02E-01 | 0.573         | 0.546 | 0.548   |
| Pattern 2       | Coeliac disease              | 0.506     | 0.510  | 0.662    | 1.81E-06 | 0.662         | 0.662 | 0.505   |
|                 | Psoriasis                    | 0.507     | 0.509  | 0.530    | 5.07E-02 | 0.529         | 0.530 | 0.496   |
|                 | Inflammatory bowel disease   | 0.502     | 0.522  | 0.592    | 2.91E-04 | 0.592         | 0.592 | 0.510   |
|                 | Multiple Sclerosis           | 0.504     | 0.526  | 0.549    | 1.68E-01 | 0.55          | 0.549 | 0.509   |

304  
 305 **Figure S3.6.4 Mean Full-PGSs among affected children also overall had a larger deviation**  
 306 **compared to mean PGS using PRS-CS**  
 307

308 For example, among T1D affected children, the mean full PGSs for CD using PRS-CS versus our approach deviated  
 309 by 1.37 [1.31, 1.44] ( $P=1.80 \times 10^{-188}$ ) and 0.87 [0.80, 0.94] ( $P=3.00 \times 10^{-93}$ ).

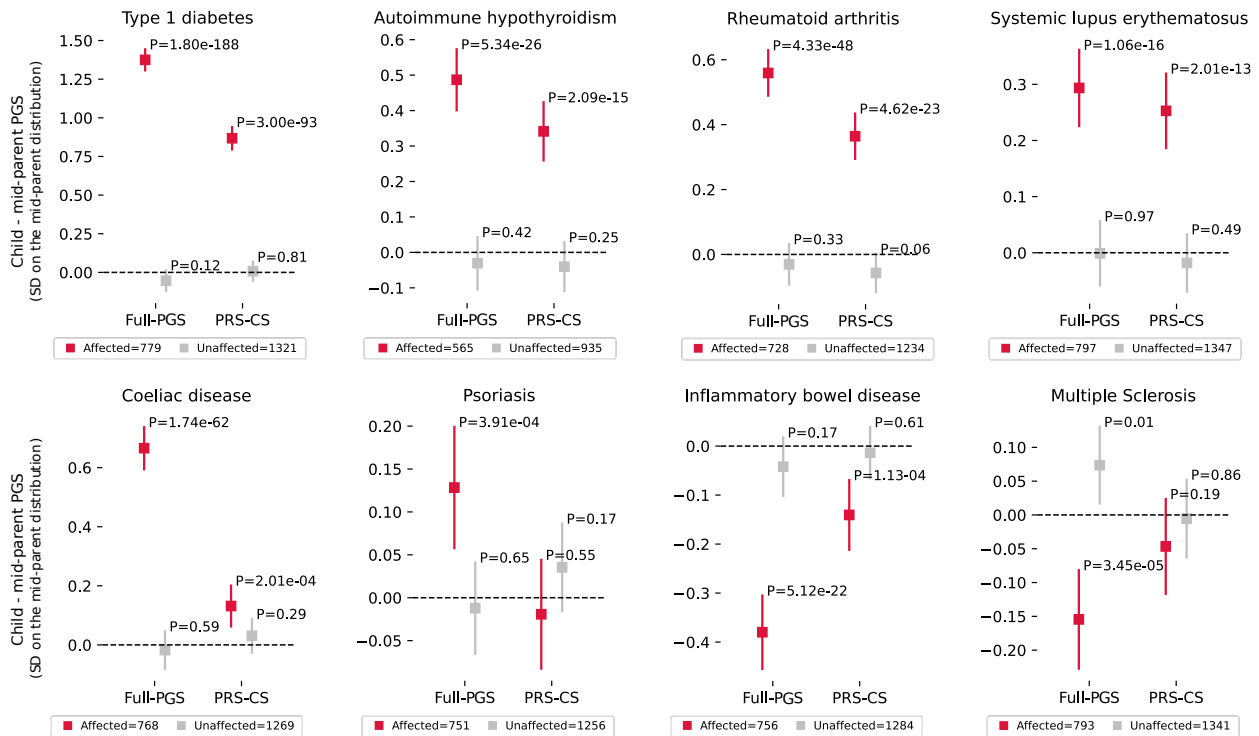

310  
 311

312 4. Supplementary discussion

313 **Table S4: Significant associations being reported from previous studies and in this study.**

314 we summarized our work and previous work reporting associations between familial aggregation of T1D and other  
 315 AIDs using nationwide population-based studies with at least 2 000 AID cases (**Table S1**). Because of the different  
 316 statistical methods and thresholds were applied in different studies, to ensure the statistics were in the same scaled  
 317 framework, we defined a significant association according to P-value (positive association with P-value<0.05: \*,  
 318 positive association with P-value<0.01: \*\*, negative association with P-value<0.01: --). From previous studies, an  
 319 association can be either between parental AID and T1D in children or familial AID and T1D.

| Disease names                   | Previous nationwide registry-based studies | Registry-based study |            | Genetic analyses |                        |
|---------------------------------|--------------------------------------------|----------------------|------------|------------------|------------------------|
|                                 |                                            | T1D age<40           | T1D age<20 | HLA PGS          | non-HLA r <sub>g</sub> |
| Type 1 diabetes                 | **                                         | **                   | **         | **               | N/A                    |
| Autoimmune hypothyroidism       | **                                         | **                   | **         | **               | **                     |
| Coeliac disease                 | **                                         | **                   | **         | **               | **                     |
| Rheumatoid arthritis            | **                                         | **                   | **         | **               | **                     |
| Vitamin B12 deficiency anaemia  | **                                         | **                   | **         |                  | **                     |
| Sarcoidosis                     | **                                         | **                   | **         | **               | **                     |
| Autoimmune hyperthyroidism      | **                                         | **                   | **         | **               | **                     |
| Mixed connective tissue disease |                                            | **                   | **         |                  | *                      |
| Sjögren syndrome                | **                                         | **                   |            | **               | **                     |
| Vitiligo                        |                                            | **                   | *          |                  | **                     |
| Primary biliary cholangitis     | **                                         | **                   | **         | **               | **                     |
| Autoimmune hemolytic anemia     |                                            | **                   |            |                  |                        |
| Myasthenia gravis               |                                            | *                    |            |                  | **                     |
| Adrenocortical insufficiency    | **                                         | *                    |            | **               |                        |
| Psoriasis                       |                                            | *                    |            | **               | *                      |
| Systemic lupus erythematosus    | **                                         |                      | **         | **               | **                     |
| IgA nephropathy                 |                                            |                      |            |                  |                        |
| Systemic sclerosis              |                                            |                      |            |                  |                        |
| Alopecia areata                 |                                            |                      | *          |                  | **                     |
| Guillain-Barre syndrome         |                                            |                      |            |                  |                        |
| Allergic purpura                |                                            |                      |            |                  |                        |
| Inflammatory bowel disease      | **                                         |                      |            | --               |                        |
| Wegener granulomatosis          | **                                         |                      |            |                  |                        |
| Ankylosing spondylitis          | *                                          |                      |            |                  |                        |
| ITP                             |                                            |                      |            |                  |                        |
| Multiple Sclerosis              | **                                         |                      |            | --               |                        |

320

## 5. References

- 1 Walker-Smith, J. A., R. Vines, and W. Grigor. "Coeliac disease and diabetes." *The Lancet* 294.7621 (1969): 650.
- 2 Thain, M. E., J. R. Hamilton, and R. M. Ehrlich. "Coexistence of diabetes mellitus and celiac disease." *The Journal of pediatrics* 85.4 (1974): 527-529.
- 3 Samantaray, S. K., B. M. Pulimood, and T. S. Koshy. "Coexistence of diabetes and hypothyroidism in South India." *Medical Journal of Australia* 1.3 (1977): 60-62.
- 4 Bottazzo, G. F., et al. "Autoimmunity in juvenile diabetics and their families." *Br Med J* 2.6131 (1978): 165-168.
- 5 Gray, R. S., R. Herd, and B. F. Clarke. "The clinical features of diabetes with coexisting autoimmune thyroid disease." *Diabetologia* 20.6 (1981): 602-606.
- 6 Binder, A., et al. "Sjögren's syndrome: association with type-1 diabetes mellitus." *Rheumatology* 28.6 (1989): 518-520.
- 7 Von Orfila, Claudine, et al. "IgA nephropathy complicating diabetic glomerulosclerosis." *Nephron* 79.3 (1998): 279-287.
- 8 Sipetić S, Vlajinac H, Kocev N, Marinković J, Radmanović S, Denić L. Family history and risk of type 1 diabetes mellitus. *Acta Diabetol.* 2002 Sep;39(3):111-5.
- 9 Kordonouri, Olga, et al. "Thyroid autoimmunity in children and adolescents with type 1 diabetes: a multicenter survey." *Diabetes care* 25.8 (2002): 1346-1350.
- 10 Douek, I. F., et al. "Three generations of autoimmune diabetes: an extended family study." *Diabetologia* 46 (2003): 1313-1318.
- 11 Alkhateeb, Asem, et al. "Epidemiology of vitiligo and associated autoimmune diseases in Caucasian probands and their families." *Pigment Cell Research* 16.3 (2003): 208-214.
- 12 Gazzaruso, Carmine, et al. "Early diagnosis of primary biliary cirrhosis in type 1 diabetes: the possible role of eosinophilia." *Diabetes care* 26.10 (2003): 2963-2964.
- 13 Hanukoglu, Aaron, et al. "Extrapancreatic autoimmune manifestations in type 1 diabetes patients and their first-degree relatives: a multicenter study." *Diabetes care* 26.4 (2003): 1235-1240.
- 14 Shimomura, Hiroko, et al. "A rare case of autoimmune polyglandular syndrome type 3." *Diabetes research and clinical practice* 61.2 (2003): 103-108.
- 15 Lambert, A. Paul, et al. "Absolute risk of childhood-onset type 1 diabetes defined by human leukocyte antigen class II genotype: a population-based study in the United Kingdom." *The Journal of Clinical Endocrinology & Metabolism* 89.8 (2004): 4037-4043.
- 16 Sanchez-Albisua, I., et al. "Coeliac disease in children with type 1 diabetes mellitus: the effect of the gluten-free diet." *Diabetic Medicine* 22.8 (2005): 1079-1082.
- 17 Barker, Jennifer M., et al. "Endocrine and immunogenetic testing in individuals with type 1 diabetes and 21-hydroxylase autoantibodies: Addison's disease in a high-risk population." *The Journal of Clinical Endocrinology & Metabolism* 90.1 (2005): 128-134.
- 18 Nielsen, Nete M., et al. "Type 1 diabetes and multiple sclerosis: a Danish population-based cohort study." *Archives of neurology* 63.7 (2006): 1001-1004.
- 19 Anaya, Juan-Manuel, et al. "Familial clustering of autoimmune diseases in patients with type 1 diabetes mellitus." *Journal of autoimmunity* 26.3 (2006): 208-214.
- 20 Goh, C., and K. Banerjee. "Prevalence of coeliac disease in children and adolescents with type 1 diabetes mellitus in a clinic based population." *Postgraduate medical journal* 83.976 (2007): 132-136.
- 21 Wakata, Nobuo, et al. "Myasthenia Gravis and Diabetes Mellitus:-A 35-year Retrospective Study." *Internal Medicine* 46.9 (2007): 557-559.
- 22 Erlich, Henry, et al. "HLA DR-DQ haplotypes and genotypes and type 1 diabetes risk: analysis of the type 1 diabetes genetics consortium families." *Diabetes* 57.4 (2008): 1084-1092.
- 23 De Block, Christophe EM, Ivo H. De Leeuw, and Luc F. Van Gaal. "Autoimmune gastritis in type 1 diabetes: a clinically oriented review." *The Journal of Clinical Endocrinology & Metabolism* 93.2 (2008): 363-371.
- 24 Hemminki, K., et al. "Familial association between type 1 diabetes and other autoimmune and related diseases." *Diabetologia* 52.9 (2009): 1820-1828.
- 25 Bronson, P. G., et al. "Analysis of maternal-offspring HLA compatibility, parent-of-origin and non-inherited maternal effects for the classical HLA loci in type 1 diabetes." *Diabetes, Obesity and Metabolism* 11 (2009): 74-83.

- 26 Kishi A, Kawabata Y, Ugi S, Iwai T, Tanaka Y, Yoshizaki T, Uzu T, Nishio Y, Ikegami H, Kashiwagi A, Maegawa H. The onset of diabetes in three out of four sisters: a Japanese family with type 1 diabetes. A case report. *Endocr J.* 2009;56(6):767-72.
- 27 Van den Driessche, A., et al. "Type 1 diabetes and autoimmune polyglandular syndrome: a clinical review." *Neth J Med* 67.11 (2009): 376-87.
- 28 Nagy, Katalin H., et al. "Type 1 diabetes associated with Hashimoto's thyroiditis and juvenile rheumatoid arthritis: a case report with clinical and genetic investigations." *Pediatric diabetes* 11.8 (2010): 579-582.
- 29 Zeglaoui, H ela, et al. "Type 1 diabetes mellitus, celiac disease, systemic lupus erythematosus and systemic scleroderma in a 15-year-old girl." *Rheumatology international* 30 (2010): 793-795.
- 30 W agner, Ana M., et al. "Predictors of associated autoimmune diseases in families with type 1 diabetes: results from the Type 1 Diabetes Genetics Consortium." *Diabetes/metabolism research and reviews* 27.5 (2011): 493-498.
- 31 Bhadada, Sanjay Kumar, et al. "Prevalence and clinical profile of celiac disease in type 1 diabetes mellitus in north India." *Journal of gastroenterology and hepatology* 26.2 (2011): 378-381.
- 32 Franzese, Adriana, et al. "Potential celiac disease in type 1 diabetes: a multicenter study." *Diabetes research and clinical practice* 92.1 (2011): 53-56.
- 33 Kota, Sunil K., et al. "Clinical profile of coexisting conditions in type 1 diabetes mellitus patients." *Diabetes & Metabolic Syndrome: Clinical Research & Reviews* 6.2 (2012): 70-76.
- 34 Parkkola, Anna, et al. "Extended family history of type 1 diabetes and phenotype and genotype of newly diagnosed children." *Diabetes care* 36.2 (2013): 348-354.
- 35 Parkkola, Anna, et al. "Extended family history of autoimmune diseases and phenotype and genotype of children with newly diagnosed type 1 diabetes." *European Journal of Endocrinology* 169.2 (2013): 171-178.
- 36 Masood, Sadia, et al. "Multiple autoimmune syndromes associated with psoriasis: a rare clinical presentation." *Oman Medical Journal* 29.2 (2014): 130.
- 37 Karavanaki, Kyriaki, et al. "Multiple autoimmunity, type 1 diabetes (T1DM), autoimmune thyroiditis and thyroid cancer: is there an association? A case report and literature review." *Journal of Pediatric Endocrinology and Metabolism* 27.9-10 (2014): 1011-1016.
- 38 D'Souza, Shalome, et al. "Henoch-Sch oenlein purpura and diabetes mellitus in a 9-year-old African-American male." *Pediatric Annals* 43.3 (2014): e61-e64.
- 39 Kuo, Chang-Fu, et al. "Familial risk of Sj gren's syndrome and co-aggregation of autoimmune diseases in affected families: a nationwide population study." *Arthritis & Rheumatology* 67.7 (2015): 1904-1912.
- 40 Fang, Fang, et al. "The autoimmune spectrum of myasthenia gravis: a Swedish population-based study." *Journal of internal medicine* 277.5 (2015): 594-604.
- 41 Kahaly, G. J., and L. Frommer. "Polyglandular autoimmune syndromes." *Journal of endocrinological investigation* 41 (2018): 91-98.
- 42 Ganji, A., Moghbeli, M. Type 1 diabetes and hyperthyroidism in a family with celiac disease after exposure to gluten: a rare case report. *Clin Diabetes Endocrinol* 4, 24 (2018).
- 43 Olamoyegun, Michael Adeyemi, and Oluwabukola Ayodele Ala. "Type 1 diabetes in a Nigerian family-occurrence in three out of four siblings: A case report." *World Journal of Diabetes* 10.10 (2019): 511.
- 44 Johnson, Adejoke M., et al. "A Rare Case Presentation: Diagnosing Primary Biliary Cholangitis in a Male Patient With Concomitant Type 1 Diabetes." *Cureus* 13.7 (2021).
- 45 Benmelouka, Amira Yasmine, et al. "Association between sarcoidosis and diabetes mellitus: a systematic review and meta-analysis." *Expert Review of Respiratory Medicine* 15.12 (2021): 1589-1595.
- 46 Yen, Fu-Shun, et al. "Maternal autoimmune disease associated with a higher risk of offspring with type 1 diabetes: A nationwide mother-child cohort study in Taiwan." *Diabetes & Metabolism* (2023): 101443.
- 47 Kang, Xiaoying, et al. "Type 1 diabetes and microscopic colitis: A nationwide matched case-control study in Sweden." *Alimentary Pharmacology & Therapeutics* (2023).
- 48 Marrosu, Maria Giovanna, et al. "Patients with multiple sclerosis and risk of type 1 diabetes mellitus in Sardinia, Italy: a cohort study." *The Lancet* 359.9316 (2002): 1461-1465.
- 49 Conrad, Nathalie, et al. "Incidence, prevalence, and co-occurrence of autoimmune disorders over time and by age, sex, and socioeconomic status: a population-based cohort study of 22 million individuals in the UK." *The Lancet* (2023).
- 50 Cohen, Jacob. *Statistical power analysis for the behavioral sciences*. Academic press, 2013.
